# Supplementary material
Source: PubMed Central journal article supplement (PMC8137309)
Supplement: mmc1.pdf [file mmc1.pdf]

# THE LANCET

## Supplementary appendix

This appendix formed part of the original submission and has been peer reviewed. We post it as supplied by the authors.

**This online publication has been corrected. The corrected version first appeared at [thelancet.com](https://www.thelancet.com) on June 24, 2021.**

Supplement to: The African COVID-19 Critical Care Outcomes Study (ACCCOS) Investigators. Patient care and clinical outcomes for patients with COVID-19 infection admitted to African high-care or intensive care units (ACCCOS): a multicentre, prospective, observational cohort study. *Lancet* 2021; **397**: 1885–94.

# SUPPLEMENTARY MATERIAL

**Patient care and clinical outcomes for patients with COVID-19 infection admitted to African high-care or intensive care units (ACCCOS): a multicentre, prospective, observational cohort study**

The ACCCOS Investigators

## Table of Contents

|                                                                                                                                                                                                                          |                                     |
|--------------------------------------------------------------------------------------------------------------------------------------------------------------------------------------------------------------------------|-------------------------------------|
| <b>Writing Committee</b> .....                                                                                                                                                                                           | <b>Error! Bookmark not defined.</b> |
| <b>Members for the African Covid-19 Critical Care (ACCCOS) Group</b> .....                                                                                                                                               | <b>Error! Bookmark not defined.</b> |
| <b>Supplementary Material S1. Case record form</b> .....                                                                                                                                                                 | <b>13</b>                           |
| <b>Supplementary Material S2. Definitions document</b> .....                                                                                                                                                             | <b>14</b>                           |
| <b>Supplementary Material S3. Statistical analysis plan</b> .....                                                                                                                                                        | <b>17</b>                           |
| <b>Supplementary Material S4. Data missingness for the secondary outcome</b> .....                                                                                                                                       | <b>19</b>                           |
| <b>Supplementary Material S5. Sensitivity analysis 1: Generalised linear mixed model with full dataset for mortality. Control are patients alive in hospital and alive and discharged.</b> .....                         | <b>20</b>                           |
| <b>Supplementary Material S6. Sensitivity analysis 2: Generalised linear mixed model with full dataset for mortality. Control are patients alive and discharged.</b> .....                                               | <b>22</b>                           |
| <b>Supplementary Material S7. Sensitivity analysis 3: Generalised linear mixed model with full dataset for mortality. Variable ‘cardiorespiratory arrest in 24 hours before admission’ not entered into the GLMM.</b> 24 |                                     |
| <b>Supplementary Material S8. Search Strategy For COVID-19 Critical Care Mortality Meta-Analysis</b> .....                                                                                                               | <b>26</b>                           |
| <b>Supplementary Material S9. PRISMA Flow Diagram For COVID-19 Critical Care Mortality Meta-Analysis</b> .....                                                                                                           | <b>27</b>                           |
| <b>Supplementary Material S10. Meta-Analysis of definitive COVID-19 Critical Care Outcomes</b> .....                                                                                                                     | <b>28</b>                           |
| <b>Supplementary Material S11. Excess COVID-19 critical care mortality in Africa</b> .....                                                                                                                               | <b>29</b>                           |
| <b>Supplementary Material S12. Meta-Analysis of mean ‘age’ of definitive COVID-19 Critical Care Outcomes studies</b> .....                                                                                               | <b>30</b>                           |
| <b>Supplementary Material S13. Meta-Analysis of mean ‘SOFA score’ of definitive COVID-19 Critical Care Outcomes studies</b> .....                                                                                        | <b>31</b>                           |
| <b>Supplementary Material S14. COVID-19 Critical Care Mortality Meta-Analysis Summary Table</b> .....                                                                                                                    | <b>32</b>                           |
| <b>Supplementary Material S15. COVID-19 Critical Care Mortality Meta-Analysis Reference List</b> .....                                                                                                                   | <b>36</b>                           |
| <b>Supplementary Material S16. Case fatality rate for Covid-19 infection as of 11 December 2020</b> .....                                                                                                                | <b>41</b>                           |

## Writing Committee

Bruce M Biccard,<sup>1</sup> Malcolm Miller,<sup>2</sup> William L Michell,<sup>3</sup> David Thomson,<sup>4</sup> Adesoji Ademuyiwa,<sup>5</sup> Ernest Aniteye,<sup>6</sup> Greg Calligaro,<sup>7</sup> Maman Sani Chaibou,<sup>8</sup> Hailu Tamiru Dhufera,<sup>9</sup> Mohamed Elfagieh,<sup>10</sup> Mahmoud Elfiky,<sup>11</sup> Muhammed Elhadi,<sup>12</sup> Maher Fawzy,<sup>13</sup> David Fredericks,<sup>14</sup> Meseret Gebre,<sup>15</sup> Abebe Genetu Bayih,<sup>16</sup> Anneli Hardy,<sup>17</sup> Ivan Joubert,<sup>18</sup> Fitsum Kifle,<sup>19</sup> Hyla-Louise Kluyts,<sup>20</sup> Kieran DM Macleod,<sup>21</sup> Zelalem Mekonnen,<sup>22</sup> Mervyn Mer,<sup>23</sup> Atilio Morais,<sup>24</sup> Vanessa Msosa,<sup>25</sup> Wakisa Mulwafu,<sup>26</sup> Andrew Ndonga,<sup>27</sup> Zipporah Ngumi,<sup>28</sup> Akinyinka Omigbodun,<sup>29</sup> Christian Owoo,<sup>30</sup> Fathima Paruk,<sup>31</sup> Jenna L Piercy,<sup>32</sup> Juan Scribante,<sup>33</sup> Yakob Seman,<sup>34</sup> Elliott H Taylor,<sup>35</sup> Dawid EA van Straaten,<sup>36</sup> P. Dean Gopalan,<sup>37</sup> on behalf of the ACCCOS Investigators\*

1. Prof Bruce M Biccard PhD, Professor and 2nd Chair, Department of Anaesthesia and Perioperative Medicine, Groote Schuur Hospital, Faculty of Health Sciences, University of Cape Town, South Africa
2. Dr Malcolm Miller, Intensivist, Division of Critical Care, Department of Anaesthesia and Perioperative Medicine, Groote Schuur Hospital, Faculty of Health Sciences, University of Cape Town, South Africa
3. Emeritus Associate Professor William L Michell FFA(SA) (Crit Care), Honorary Specialist Division of Critical Care, Department of Anaesthesia and Perioperative Medicine, Groote Schuur Hospital, and Senior Scholar, Department of Surgery, Faculty of Health Sciences, University of Cape Town, South Africa
4. Dr David Thomson, MMed, Consultant, Division of Critical Care, Department of Anaesthesia and Perioperative Medicine, Groote Schuur Hospital, Faculty of Health Sciences, University of Cape Town, South Africa
5. Prof Adesoji O Ademuyiwa, FACS, Professor of Surgery (Paediatric and Surgical Epidemiology), Department of Surgery, College of Medicine, University of Lagos and Lagos University Teaching Hospital, Lagos, Nigeria
6. Dr Ernest Aniteye, Associate Professor of Anaesthesia, Cardiothoracic Anaesthetist and Intensivist, Korle-Bu Teaching Hospital and University of Ghana Medical School, Accra, Ghana
7. A/Prof Greg Calligaro MMed (Centre for Lung Infection and Immunity, Division of Pulmonology, Department of Medicine and UCT Lung Institute and South African MRC/UCT Centre for the Study of Antimicrobial Resistance, University of Cape Town, Cape Town, South Africa.
8. Maman Sani Chaibou, Anaesthesiologist and Chief of Department of Anesthesiology, Intensive Care and Emergency, National Hospital of Niamey, Republic of Niger
9. Dr Hailu Tamiru Dhufera MD, Medical Service Directorate General, Ministry of Health, Ethiopia

10. Prof Mohamed Ahmed Elfagieh FRCS MD, NCI, Misrata, Libya
11. Dr Mahmoud Elfiky MD, Kasr Al Ainy Faculty of Medicine, Cairo University, Ali Ibrahim St, Manial, Cairo 11432.
12. Dr Muhammed Elhadi MBBCh, Faculty of Medicine, University of Tripoli, University Road, Furnaj, 13275 Tripoli, Libya
13. Prof Maher Fawzy MD, Emeritus Professor of Anesthesia , ICU and Pain Management, Faculty of Medicine, Cairo University, Egypt
14. Dr David Fredericks Cert Crit Care(SA), Critical Care Subspecialist, Department of Critical Care Medicine, Grootte Schuur Hospital, Faculty of Health Sciences, University of Cape Town, South Africa.
15. Dr Meseret Gebre, MD, Pediatrician and Researcher, Armauer Hansen Research Institute, Addis Ababa, Ethiopia
16. Dr Abebe Genetu Bayih, Director General, Armauer Hansen Research Institute, Addis Ababa, Ethiopia
17. Ms Anneli Hardy MS Statistics, Statistical Consultant, Department of Statistical Sciences, Faculty of Science, University of Cape Town, South Africa
18. A/ Prof Ivan Joubert, FCA(SA), Head of Critical Care, Division of Critical Care, Department of Anaesthesia and Perioperative Medicine, Grootte Schuur Hospital, Faculty of Health Sciences, University of Cape Town, South Africa
19. Dr Fitsum Kifle Belachew, Lecturer, BSc, Debre Berhan University College of Medicine Department of Anaesthesia, Debre Berhan Comprehensive Specialized Hospital, Debre Berhan, Ethiopia
20. Prof H Kluys MMed (Anaes), Department of Anaesthesiology, Sefako Makgatho Health Sciences University, South Africa
21. Dr Kieran DM Macleod MBChB, Glasgow Royal Infirmary, Glasgow, United Kingdom
22. Dr Zelalem Mekonnen (MD,MSc), Armauer Hansen Research Institute, Addis Ababa, Ethiopia
23. Prof Mervyn Mer PhD, Department of Medicine, Divisions of Critical Care and Pulmonology, Charlotte Maxeke Johannesburg Academic Hospital and Faculty of Health Sciences, University of the Witwatersrand, Johannesburg, South Africa
24. Atilio Morais PhD, Cardiothoracic and Vascular Surgeon, Departamento de Cirurgias, Hospital Central de Maputo, Avenida Eduardo Mondlane, 2600, Faculdade de Medicina, Universidade Eduardo Mondlane, Maputo, Moçambique
25. Vanessa Msosa, FCS(ECSA), General Surgeon, Kamuzu Central Hospital, P.O. Box 149, Lilongwe, Malawi

26. Wakisa Mulwafu PhD, Associate Professor, College of Medicine, Private Bag 360, Blantyre, Malawi.
27. Andrew Ndonga MMed Surgery (UON), Consultant Surgeon & Program Director, Mater Misericordiae hospital  
Nairobi
28. Zipporah Ngumi, FFARCS, Department of Anaesthesia, University of Nairobi School of Medicine, Kenya
29. Prof Akinyinka O Omigbodun FWACS, Professor of Obstetrics and Gynaecology, College of Medicine, University  
of Ibadan, Nigeria
30. Dr Christian Owoo, FGCS, Consultant Anaesthetist and Intensivist, University of Ghana Medical School, Korle Bu  
Teaching Hospital and University of Ghana Medical Centre, Accra, Ghana
31. Prof Fathima Paruk PhD, Associate Professor, Clinical and Academic Head of Department of Critical Care, Steve  
Biko Academic Hospital, Faculty of Health Sciences, University of Pretoria, South Africa
32. Dr Jenna L Piercy, Cert Crit Care, Head Clinical Unit, Division of Critical Care, Department of Anaesthesia and  
Perioperative Medicine, Groote Schuur Hospital, Faculty of Health Sciences, University of Cape Town, South  
Africa
33. A/Prof Juan Scribante, PhD Associate Professor, Department of Anaesthesiology, School of Clinical Medicine.  
Faculty of Health Sciences, University of the Witwatersrand, South Africa
34. Dr Yakob Seman A MPH, Director General, Medical Services, Ministry of Health, Ethiopia
35. Elliott H Taylor BSc (Hons), Oxford University Global Surgery Group, Nuffield Department of Surgical Sciences,  
University of Oxford, United Kingdom and Global Surgery Division, Department of Surgery, University of Cape  
Town, Cape Town, South Africa
36. Mr Dawid EA van Straaten BA, Safe Surgery South Africa NPC, 5 14<sup>th</sup> Street, Parkhurst, Gauteng, 2193, South  
Africa
37. Prof P. Dean Gopalan, PhD, Chief Specialist and Head of Discipline: Anaesthesiology & Critical Care, School of  
Clinical Medicine, University of KwaZulu Natal, Durban, South Africa

## Members for the African Covid-19 Critical Care (ACCCOS) Group

**Writing Committee:** Bruce M Biccard, Malcolm Miller, William L Michell, David Thomson, Adesoji Ademuyiwa, Ernest Aniteye, Greg Calligaro, Maman Sani Chaibou, Hailu Tamiru Dhufera, Mohamed Elfagieh, Mahmoud Elfiky, Muhammed Elhadi, Maher Fawzy, David Fredericks, Meseret Gebre, Abebe Genetu Bayih, Anneli Hardy, Ivan Joubert, Fitsum Kifle, Hyla-Louise Kluyts, Kieran DM Macleod, Zelalem Mekonnen, Mervyn Mer, Atilio Morais, Vanessa Msosa, Wakisa Mulwafu, Andrew Ndonga, Zipporah Ngumi, Akinyinka Omigbodun, Christian Owoo, Fathima Paruk, Jenna L Piercy, Juan Scribante, Yakob Seman, Elliott H Taylor, Dawid EA van Straaten, P. Dean Gopalan

**Steering Committee:** Bruce M Biccard, P. Dean Gopalan, Greg Calligaro, David Fredericks, Ivan Joubert, Hyla-Louise Kluyts, Mervyn Mer, Malcolm Miller, William L Michell, Fathima Paruk, Jenna L Piercy, David Thomson, Juan Scribante, Dawid EA van Straaten.

**Co-Chief Investigators:** Bruce M Biccard, P Dean Gopalan

**Statistical analysis:** Bruce M Biccard, Anneli Hardy

**Meta-analysis:** Elliott H Taylor, Kieran DM Macleod, Juan Scribante, Muhammed Elhadi, Bruce M Biccard

### ACCCOS Investigators:

Hospital Lead Investigators\*

### Egypt.

#### National Leaders:

Mahmoud Elfiky  
Maher Fawzy

#### *Ain-Shams University Hospital*

Ahmed Awad  
Hend Hussein  
Mahmoud Shaban  
Merihan Elbadawy

#### *Assiut University Hospital*

Aboubakr Ali  
Aliae Mohamed Hussein  
Emad Zariel kamel  
Fatma A. Monib  
Islam Ahmed (Check with site)  
Mahmoud M. Saad  
Mohammed Ali Al-Quossi  
Nashwa Rafaat (Check with site)

#### *Al Kasr Al Einy Specialised Hospital*

Ahmed O Elmehrath  
Ahmed Cordie  
Mohamed Elganainy  
Mostafa El-Shazly  
Mahmoud Essam

Omar A. Abdelwahab

*Aswan University Hospital*  
Islam Galal

*Cairo University Hospitals*  
Beshoui labib  
Dalia Omran  
Maher Fawzy\*  
Mahmoud Elfiky\*

*Damietta Specialized Hospital*  
Ahmed Azzam  
Mohammed Azab

*El Sheikh Zayed Specialized Hospital*  
Sherief Ghozy

*Endemic Medicine Department, Helwan University*  
Ahmed Tawheed  
Mohamed El Kassas\*  
Mahmoud Gamal

*Minia University Hospital*  
Aml Azzam  
Neama Ahmed  
Yasmin K. NasrEldin  
Ali Abdelsalam

*Wingat Royal Hospital*  
Mohamed Elganainy  
Omar Elmandouh

## **Ethiopia.**

### **National Leaders:**

Abebe Genetu Bayih  
Fitsum Kifle  
Hailu Tamiru Dhufera  
Meseret Gebre  
Yakob Seman  
Zelalem Mekonnen

*Debre Birhan Comprehensive Specialized Hospital*  
Abebe Addisie  
Akine Eshete  
Fitsum Kifle\*  
Kokeb Desita

*Eka Kotebe Hospital*  
Hiruy Araya\*  
Yared Agidew

*Hawassa University Hospital*  
Addisu Desalegn Andabo  
Emnet Tesfaye\*

*Jimma University Covid-19 Treatment Center*  
Elias Ali Yesuf  
Gelaw Hailemariam\*  
Habtamu Sime  
Dame Fikadu Keneni

*St. Paul's Hospital Millennium Medical College*  
Menbeu Sultan Mohammed\*  
Yemane Gebremedhin  
Yoseph Taye

*St. Peter's Specialized Hospital*  
Tamiru Assefa Mebrate  
Tigist Tesfaye Bedane\*  
Tirunesh Busha Gemechu

*Yekatit 12 Hospital Medical College*  
Elias Tewaba Abera  
Ayele Teshome

## **Ghana.**

**National Leaders:**  
Christian Owoo  
Ernest Aniteye

*Korle Bu Teaching Hospital*  
Alfred Doku  
Christian Owoo  
Jane Sandra Afriyie-Mensah\*

*University of Ghana Medical Centre*  
Aba Lawson  
Christian Owoo\*  
Daniel Akwanfo Yaw Sottie  
Emma Addae  
Ernest Ofosu-Appiah  
William Obeng

## **Kenya.**

**National Leaders:**  
Andrew Ndonga  
Zipporah Ngumi

*Kenyatta National Teaching and Referral Hospital*  
Anne Mugeru

*Mater Misericordiae Hospital*  
Andrew Ndonga



*Jaramogi Oginga Odinga Teaching*  
Caesar Bitta

**Libya.**

**National Leaders:**

Mohamed Elfagieh  
Muhammed Elhadi

*Alshahid Attia Alkasah General Hospital*  
Mohammed Abdalraheem Huwaysh\*  
Mohammed Mahdi Ali Yahya

*Almarj General Hospital*  
Alsnosy Abdullah Khalefa Mohammed  
Amrajaa Alsalihin Mohammed Majeed  
Amkhatirah Emad Mousay Mohammed  
Elsalhein Majeed

*Almawasfat Hospital*  
Abdurraouf Abusalama  
Ehab Altayr

*Benghazi Medical Center*  
Taha Abubaker

*Gheryan Isolation Centre*  
Akram Mohammed Alkaseek\*

*Mietiga Hospital*  
Butaina Abdulhafith  
Zainab Alziyituni\*  
Marwa F Gamra

*Misrata Medical Center*  
Mohamed Muftah Anaiba \*

*Soq Elthlath Isolation Centre*  
Samer Khel\*

*Sabha Medical Center*  
Mohammed Abdelkabir\*  
Saedah Abdeewi  
Safia Adam

*Sorman Teaching Hospital*  
Abdulmueti Alhadi\*

*Tripoli Central Hospital*  
Ahmed Alsoufi  
Muhannud Binnawara\*

*Tripoli University Hospital (Tripoli Medical Center)*  
Ahmed Msherghi

*Tobruk Medical Center*  
Ahmad Elmabri Mohammad Bouhuwaish\*  
Ahmed SA Taher

*Zawiyat Al dahmani Hospital*  
Investigator

**Malawi.**

**National Leaders:**

Vanessa Msosa  
Wakisa Mulwafu

*Mzuzu Central Hospital*  
Francis Masoo

*Queen Elizabeth Central Hospital*  
Singatiya Stella Chikumbanje  
Palesa Chisala

*Zomba Central Hospital*  
Delia Mabedi

**Mozambique.**

**National Leader:**

Atilio Morais

*Instituto do Coracao*  
Antonio Carlos  
João Macave

*Maputo Central Hospital*  
Atilio Morais  
Cesaltina Lorenzoni  
Jorge Mambo  
Isabel Chissaque  
Mouzinho Saide

**Niger**

**National Leader:**

Maman Sani Chaibou

*Hôpital De Référence Maradi*  
Maikassoua Mamane

*Hôpital Général De Référence Niamey*  
Foumakoye Adamou

**Nigeria.**

**National Leaders:**

Adesoji Ademuyiwa  
Akinyinka Omigbodun

*Afe Babalola University Multispecialist Hospital, Ado-Ekiti, Nigeria*

Ademola Adeyeye\*  
Akinola Akinmade

*Federal Medical Centre, Birnin Kebbi*

Yakubu Momohsani\*  
John Bamigboye

*Jos University Teaching Hospital, Jos, Plateau State, Nigeria*

Donald Orshio  
Erdoo Suckie Isamade  
Henry Embu  
Samuel Nuhu\*

*Nnamdi Azikwe University Teaching Hospital*

Samuel Ojiakor\*

*State Specialist Hospital Maiduguri*

Ahmed Nuhu\*  
Salisu Kwayabura

*University College Hospital, Ibadan, Oyo State, Nigeria*

Adeola Fowotade  
Arinola Sanusi  
Babatunde Osinaike\*  
Olusola Idowu  
Olukemi Adekanmbi

*University of Maiduguri Teaching Hospital*

Abdullahi Oteikwu Amali  
Sanusi Ibrahim  
Adamu Abba Adamu  
Ibrahim Kida

*University of Port Harcourt Teaching Hospital*

Job Otokwala\*  
Mahmoud Essam  
Olubusola Alagbe-Briggs  
Sylvanus Ojum

**South Africa.**

**National Leaders:**

Fathima Paruk  
Juan Scribante

*Ahmed Kathrada Private Hospital*

Ismail Sikander Kalla\*

*Dr George Mukhari Academic Hospital*  
Aurence Mdladla\*  
Tebogo Mabotja

*General Justice Gizenga Mpanza Regional Hospital*  
Ria Naidoo  
Roel Matos-Puig\*

*Grey's Hospital*  
Arisha Ramkillawan\*  
Michelle Smith

*Groote Schuur Hospital*  
Christel Arnold-Day  
David Thomson  
Greg Calligaro  
Jenna Piercy  
Lance Michell  
Liam Devenish  
Malcolm Miller\*  
Marcelle Jagga  
Nicole Fernandes  
Ivan Joubert

*Inkosi Albert Luthuli Central Hospital*  
Dean Gopalan  
Santosh Pershad\*  
Thuli Biyase

*Kalafong Provincial Tertiary Hospital*  
Mapule Rammego  
Masikhanyise Elizabeth Dhlamini  
Matthew Neuhoff  
Nicola Grabowski\*  
Sabelo Zwane

*Livingstone Hospital*  
Tobisa Fodo\*

*Nelson Mandela Academic Hospital*  
Anthony Usenbo  
Busisiwe Mrara  
Freddy Kabambi

*New Somerset Hospital*  
Estie Cloete\*  
Leonel De Caires  
Roger Dickerson  
Candice Louw  
Alida Theron  
Ryan Herselman  
Jannes Badenhorst  
Godfrey Moletsane  
Helene Loots

*Robert Mangaliso Sobukwe Hospital*  
Frans Christiaan Vorster

*Steve Biko Academic Hospital*  
Fathima Paruk  
Julian Chausse  
Matthew Neuhoff  
Melinda Sebastian  
Nicola Grabowski  
Paul Rheeder  
Wesley van Hougenhouck-Tulleken

*Universitas Academic Hospital*  
Carin Snyman  
Durotolu Adeleke  
Jovan Esterhuizen  
Leoni de Man  
Matema Mosola  
Pieter van der Linde  
Reinier Swart  
Shaun Maasdorp  
Tina Martins  
Veneshree Govender



## Supplementary Material S2. Definitions document

### ACCCOS CRF DEFINITIONS

Ability to provide invasive ventilation

At time of admission the Unit had the resources to provide invasive mechanical ventilation

Active TB

Current diagnosis of pulmonary or extrapulmonary tuberculosis (either empiric or microbiological diagnosis) whether currently on treatment or not.

Admission delayed due to lack of resources (e.g. bed, staffing etc)

Admission to critical care delayed by more than one hour because of the non-availability of a bed, ventilator, staff or any other resource required to provide critical care.

Age

Age in years on day of referral to the Critical Care Unit

Antiretroviral therapy

Currently on an antiretroviral therapy program

Cancer

Diagnosis of cancer in the last 12 months (whether treated with surgery, radiotherapy or chemotherapy, or not) with the exclusion of non-melanomatous skin cancers.

Cardiorespiratory arrest

Cardiac arrest requiring cardiopulmonary resuscitation

Cardiovascular support

Intravenous fluid, inotrope or vasoconstrictor to maintain blood pressure or cardiac output

Chronic/ malaria within 3 months

Chronic malaria (with anaemia or splenomegaly) OR previous treatment for malaria (either as inpatient or outpatient) within the last 3 months.

Chronic kidney disease

Diagnosis of chronic kidney disease (stable abnormal renal function with documentation of serum creatinine) whether on dialysis or not

Chronic liver disease

Confirmation of one of the following: chronic jaundice, cirrhosis, portal hypertension with ascites and/or splenomegaly

Chronic lung disease

Diagnosis of airways disease (asthma, COPD [emphysema, chronic bronchitis], bronchiectasis), having previously been prescribed inhaler therapy OR pulmonary fibrosis OR post-infectious lung disease.

CNS

Central Nervous system

Congestive heart failure

Diagnosis of CHF with hospitalisation in the last 12 months

Coronary artery disease

History of previous myocardial infarction, OR currently on anti-anginal medication.

COVID-19 positive.

An internationally accepted positive test for the presence of the SARS-CoV-2 virus in nasopharyngeal or bronchial secretions.

CPAP

Continuous positive airway pressure of at least 5-10cmH<sub>2</sub>O via face-mask or helmet

Critical Care Unit

An Intensive Care Unit or High Care unit that manages critically ill patients

Current smoker

Current smoker (daily) of any tobacco product (cigarettes, pipes or cigars).

CVS

Cardiovascular system

Decision to limit therapy

A decision was made to not provide additional therapy (e.g. ventilation, adrenaline, dialysis) because of bad prognosis but to continue with current therapy.

Diabetes mellitus

Diagnosis of diabetes on oral medication OR insulin with or without diabetic complications

Elective Intubation

A planned intubation while the patient is stable

Emergency Department:

An area of the hospital where newly admitted patients are triaged and /or managed including an epidemic triage area

Emergency Intubation

Immediate intubation required for an acute deterioration

GCS

Glasgow coma score out of 15

Haem

Haematological system

HCU

High Care Unit. A patient area that provides a level of care between that of an ICU and a general ward but not usually invasive ventilation.

HFNO

High flow nasal oxygen humidified to 37°C and at a flow of 45-60L/min with variable inspired oxygen concentrations from 40-100%

HIV/AIDS

Diagnosis of HIV infection, whether on antiretroviral therapy or not.

Hypertension

Diagnosis of hypertension, whether on treatment or not.

ICU

Intensive care unit. A patient area that provides invasive ventilation, other organ support and monitoring.

Inotropes/Vasopressors

Catecholamines such as dobutamine, dopamine, adrenaline (epinephrine), Noradrenaline (norepinephrine), ephedrine, phenylephrine, vasopressin and its analogs, milrinone.

Dialysis

Renal replacement therapy for acute kidney injury e.g. Intermittent haemodialysis, Sustained low efficiency daily dialysis (SLEDD) or continuous venous-venous haemodialysis (CVVHD)

Invasive ventilation

Intermittent positive pressure ventilation via an endotracheal tube or tracheostomy

NIV

Non-invasive ventilation. Positive pressure mechanical ventilation via a face mask/helmet or nasal mask delivering pressure supported breaths and/or mandatory ventilatory support e.g. CPAP with PSV (pressure support ventilation) or Non-invasive SIMV (synchronized intermittent mandatory ventilation)

No Critical Care beds

A High Care or Intensive Care bed not available due to insufficient space, equipment or staff

Nurse to patient ratio

The average number of patients managed by one nurse (day and night) (number entered can have 1 decimal place)

Organ support indication to "other area", HCU or ICU

Choose none, one or many of the listed organ systems requiring support when referred to Critical Care

Other

Any other form of active organ support

"Other Area for critical care"

An area set up to manage the overflow of CoVID-19 patients requiring critical care.

Patient refused care

Patient or surrogate declined invasive ventilation or admission to critical care

Physician available on site 24/7

A doctor was on-site at all times exclusively for the patients in the critical care unit

Proned on mechanical ventilation

Turning the patient to lie front (ventral surface) down on the bed while intubated and ventilated

Quick SOFA

Quick sequential organ failure assessment. A score devised to screen for sepsis in emergency departments and wards.<sup>1</sup>



#### Renal support

Any form of haemodialysis or peritoneal dialysis

Repurposed/experimental Covid-19 drug therapy

The use of any drug for presumed antiviral effect including subjects on a blinded study that includes a placebo

Resp Rate

Respiratory rate

Respiratory support

Oxygen mask >40%, continuous positive airway pressure (CPAP), high flow nasal oxygen (HFNO), non-invasive ventilation

SBP

Systolic blood pressure

SOFA score

Sequential organ failure assessment score. See bottom of CRF for details <sup>2</sup>

#### Steroid Therapy

Corticosteroids administered while in critical care except when used to treat septic shock or a pre-existing condition (e.g. Asthma)

#### Stroke or Transient ischaemic attack

Known cerebrovascular disease with previous stroke (independent of extent of neurological deficit), or previous transient ischaemic attack.

#### Suspected COVID-19 infection

As qRT-PCR testing was not available at all participating hospitals, patients were also included based on either clinical or radiological findings. Clinical diagnosis consistent with SARS-CoV-2 infection was made by a senior physician and based on clinical presentation of symptoms highly suspicious for SARS-CoV-2 infection, including cough, fever, and/or myalgia.<sup>3</sup> Radiological diagnosis was based on computed tomography (CT) of the chest, with typical findings in keeping with locally implemented protocols.

#### Therapeutic anticoagulation

Any anticoagulant exceeding normal doses used for thromboembolic prophylaxis or to prevent dialysis circuit clotting.<sup>4</sup>

Too sick for Critical Care

Admission refused because subject assessed to be too ill to benefit from critical care

Too well for Critical Care

Admission refused because subject likely to survive without Critical Care

Withdrawal of Life support

A life sustaining treatment was stopped (e.g. mechanical ventilation, inotropes) because of bad prognosis

#### References

1. Singer M, Deutschman CS, Seymour CW, et al. The Third International Consensus Definitions for Sepsis and Septic Shock (Sepsis-3). *JAMA*. 2016;315(8):801–810. doi:10.1001/jama.2016.0287
2. Vincent, J.-., Moreno, R., Takala, J. *et al*. The SOFA (Sepsis-related Organ Failure Assessment) score to describe organ dysfunction/failure. *Intensive Care Med* **22**, 707–710 (1996). <https://doi.org/10.1007/BF01709751>
3. Zhou F, Yu T, Du R, et al. Clinical course and risk factors for mortality of adult inpatients with COVID-19 in Wuhan, China: a retrospective cohort study. *Lancet* 2020; 395(10229): 1054-62.
4. Tang H, Bai H, Chen X, Gong J, Li D, Sun Z. .Anticoagulant Treatment Is Associated With Decreased Mortality in Severe Coronavirus Disease 2019 Patients With Coagulopathy  
*J. Thromb. Haemost.* 2020 Mar 27;[Epub Ahead of Print],

## Supplementary Material S3. Statistical analysis plan

### Primary outcome

The primary outcome is in-hospital mortality in adult patients referred to intensive care or high-care units following suspected or known COVID-19 infection in Africa.

### Statistical analysis plan for primary objective

We will present the incidence and 95% CI for these data.

### Secondary outcomes

To determine the risk factors (resources, comorbidities and interventions) associated with mortality in adult patients with suspected or known COVID-19 infection in Africa.

The research questions to be addressed are the following. In patients with suspected or known COVID-19 infection in Africa;

1. What are the critical care resources associated with survival?
2. What patient comorbidities and other risk factors are associated with in-hospital mortality?
3. What hospital interventions are associated with in-hospital survival?

### Statistical analysis plan

Categorical variables will be described as proportions and compared using chi-square tests, Fisher's exact tests, Pearson's chi-square tests or chi-square tests with Yates correction, as appropriate. Continuous variables will be described as mean and standard deviation if normally distributed or otherwise median and interquartile range (IQR). Comparisons of continuous variables between groups will be performed using unpaired t-tests or one-way ANOVA as appropriate. Univariate analysis will be performed to test for risk factors associated with in-hospital death.

The main model will only include patients with complete outcome data (i.e. patients who are still in hospital receiving therapy, and have not reached the outcome definition of death, discharge, or in-hospital at 30 days will be excluded). Generalized linear mixed models using a logit link will be used to identify independent risk factors for the binary outcome of mortality. We will use a three-level generalized mixed model, with patients being at the first level, hospital at the second and country at the third level, to account for the expected correlation in outcomes within hospitals and countries. We will exclude patients with missing values for potential risk predictors, and only use a complete case analysis if there are <5% of the dataset with incomplete potential clinical risk predictors.<sup>8</sup> All risk factors will be entered into the model, unless the number of reported deaths is insufficient to provide 10 events (deaths) per variable.<sup>7</sup> Should the events per variable be <10, then variables with a univariate association of  $p < 0.05$ , and variables with biological plausibility and a low rate of missing data will be used.

Variables to be considered for inclusion in the model;

- i. Age
- ii. Sex
- iii. BMI
- iv. COVID-19 positive or suspected (sensitivity only known positive)
- v. Coronary artery disease
- vi. Congestive heart failure
- vii. Hypertension
- viii. Stroke or Transient ischaemic attack
- ix. Diabetes mellitus
- x. Cancer
- xi. Current smoker
- xii. Chronic Lung Disease
- xiii. Active TB
- xiv. Chronic Liver Disease
- xv. HIV/AIDS (no, yes, yes on anti-retrovirals)
- xvi. Chronic/previous malaria
- xvii. Chronic kidney disease
- xviii. Cardiorespiratory arrest in 24 hours prior to critical care referral
- xix. Quick SOFA score on referral
- xx. SOFA score on referral/ admission

- xxi. Was admission delayed due to lack of resources (e.g. bed, staffing etc)
- xxii. Nurse to patient ratio
- xxiii. Ability to provide invasive ventilation for patient if required
- xxiv. Physician available on site 24/7 for patient
- xxv. Indication for admission (number of organ system support i.e. none, one, two, three or more)
- xxvi. Respiratory support (None, Oxygen mask, HFNO, CPAP)
- xxvii. Proned (None, not ventilated, on mech ventilation)
- xxviii. Ventilation (None, Non-invasive ventilation, Invasive ventilation)
- xxix. Intubation (no, yes elective, yes emergency)
- xxx. Inotropes/ vasoconstrictors
- xxxi. Dialysis
- xxxii. Therapeutic anticoagulation
- xxxiii. Steroid therapy
- xxxiv. Repurposed/ experimental Covid-19 drug therapy
- xxxv. ECMO

Collinearity will be assessed using the variance inflation factor. If collinearity is detected, then variables will either be excluded or combined. The model fit will be evaluated.

Results of the logistic regression will be reported as adjusted odds ratios (OR) with 95% confidence intervals (CI). The models will be assessed through the use of sensitivity analyses to explore possible interacting factors and examine any effect on the results.

A single final analysis is also planned at the end of the study.

Univariate and multivariate statistical analyses will be performed using the Statistical Package for the Social Sciences (SPSS) version 24 (SPSS Inc., Chicago, IL, USA).

#### Sensitivity analyses for the secondary outcome

1. Analysis of confirmed Covid-19 positive patients only
2. Analysis which excludes all patients who had withdrawal of life support or decision to limit therapy

#### Additional analyses

Description of participating sites will include the following;

1. Number of hospital beds
2. Number of critical care beds allowing invasive ventilation
3. Number of critical care and high-care beds not allowing invasive ventilation
4. Nurse to patient ratio for critical care patients during the day
5. Nurse to patient ratio for critical care patients during the night
6. Number of specialist intensivists managing patients in critical care unit
7. Number of other specialist doctors managing patients in critical care unit
8. Number of non-specialist doctors managing patients in critical care unit
9. Doctor to patient ratio for critical care patients
10. Doctor on site in the critical care unit after hours
11. How many extra ventilators could be used for a critical care surge?
12. ICU type ventilators
13. Operating room type ventilators
14. ECMO
15. Proning during mechanical ventilation
16. Pulse oximetry for all, some or no patients
17. Ability to do arterial blood gases

#### Supplementary Material S4. Data missingness for the secondary outcome

|                                                                      | Missing (n) | Missing (%) | Valid (n) |
|----------------------------------------------------------------------|-------------|-------------|-----------|
| Body mass index                                                      | 1544        | 49.2%       | 1596      |
| Prone ventilation                                                    | 314         | 10.0%       | 2826      |
| Admission delayed due to lack of resources (e.g. bed staffing etc)   | 193         | 6.1%        | 2947      |
| Steroid therapy                                                      | 129         | 4.1%        | 3011      |
| Nurse to patient ratio                                               | 78          | 2.5%        | 3062      |
| Quick SOFA score                                                     | 71          | 2.3%        | 3069      |
| Current smoker                                                       | 62          | 2.0%        | 3078      |
| Therapeutic anticoagulation                                          | 56          | 1.8%        | 3084      |
| Physician onsite 24 hours a day for 7 days per week                  | 56          | 1.8%        | 3084      |
| HIV/ AIDS                                                            | 56          | 1.8%        | 3084      |
| Active tuberculosis                                                  | 56          | 1.8%        | 3084      |
| Chronic kidney disease                                               | 55          | 1.8%        | 3085      |
| Inotropes/ vasoconstrictors                                          | 54          | 1.7%        | 3086      |
| Cardiorespiratory arrest in 24 hours prior to critical care referral | 54          | 1.7%        | 3086      |
| Chronic liver disease                                                | 54          | 1.7%        | 3086      |
| Congestive heart failure                                             | 53          | 1.7%        | 3087      |
| Chronic lung disease                                                 | 52          | 1.7%        | 3088      |
| Cancer                                                               | 52          | 1.7%        | 3088      |
| Stroke or transient ischaemic attack                                 | 52          | 1.7%        | 3088      |
| Chronic malaria/ malaria within 3 months                             | 51          | 1.6%        | 3089      |
| Diabetes                                                             | 50          | 1.6%        | 3090      |
| Coronary artery disease                                              | 47          | 1.5%        | 3093      |
| Respiratory support                                                  | 43          | 1.4%        | 3097      |
| Number of organs requiring support                                   | 36          | 1.1%        | 3104      |
| Hypertension                                                         | 36          | 1.1%        | 3104      |

**Supplementary Material S5. Sensitivity analysis 1: Generalised linear mixed model with full dataset for mortality. Control are patients alive in hospital and alive and discharged.**

| Dataset                                  | Original (n=1299) |         |          |         | Imputed (n=3140) |         |          |         | Imputed (n=2995)              |         |          |         | Imputed (n=2710)                                           |         |          |         |
|------------------------------------------|-------------------|---------|----------|---------|------------------|---------|----------|---------|-------------------------------|---------|----------|---------|------------------------------------------------------------|---------|----------|---------|
| Sensitivity                              | Full dataset      |         |          |         | Full dataset     |         |          |         | Confirmed SARS-CoV-2 positive |         |          |         | Confirmed SARS-CoV-2 positive and no limitation of therapy |         |          |         |
|                                          | Odds ratio        | 2-5% CI | 97-5% CI | p-value | Odds ratio       | 2-5% CI | 97-5% CI | p-value | Odds ratio                    | 2-5% CI | 97-5% CI | p-value | Odds ratio                                                 | 2-5% CI | 97-5% CI | p-value |
| Intercept                                | 0.01              | 0.00    | 0.03     | <0.001  | 0.01             | 0.00    | 0.04     | <0.001  | 0.01                          | 0.00    | 0.04     | <0.001  | 0.01                                                       | 0.00    | 0.04     | <0.001  |
| Age (years)                              | 1.03              | 1.02    | 1.04     | <0.001  | 1.03             | 1.02    | 1.04     | <0.001  | 1.03                          | 1.02    | 1.04     | <0.001  | 1.03                                                       | 1.02    | 1.04     | <0.001  |
| Male                                     | 0.76              | 0.53    | 1.10     | 0.14    | 0.86             | 0.69    | 1.06     | 0.15    | 0.88                          | 0.71    | 1.09     | 0.24    | 0.84                                                       | 0.66    | 1.06     | 0.14    |
| <i>Body mass index</i>                   |                   |         |          |         |                  |         |          |         |                               |         |          |         |                                                            |         |          |         |
| <25                                      | Reference         |         |          |         |                  |         |          |         |                               |         |          |         |                                                            |         |          |         |
| 25-29.9                                  | 1.30              | 0.81    | 2.07     | 0.27    | 1.12             | 0.78    | 1.61     | 0.52    | 1.13                          | 0.79    | 1.63     | 0.49    | 1.14                                                       | 0.77    | 1.69     | 0.50    |
| 30-34.9                                  | 1.61              | 0.91    | 2.83     | 0.10    | 1.06             | 0.73    | 1.53     | 0.77    | 1.07                          | 0.73    | 1.55     | 0.73    | 0.99                                                       | 0.63    | 1.55     | 0.96    |
| 35-39.9                                  | 1.74              | 0.83    | 3.65     | 0.14    | 1.16             | 0.74    | 1.81     | 0.51    | 1.17                          | 0.75    | 1.84     | 0.48    | 1.24                                                       | 0.73    | 2.09     | 0.42    |
| >40                                      | 1.89              | 0.86    | 4.16     | 0.11    | 1.11             | 0.66    | 1.86     | 0.70    | 1.08                          | 0.61    | 1.92     | 0.77    | 1.06                                                       | 0.58    | 1.93     | 0.85    |
| Coronary artery disease                  | 0.69              | 0.36    | 1.31     | 0.26    | 0.80             | 0.54    | 1.19     | 0.27    | 0.84                          | 0.56    | 1.26     | 0.40    | 0.81                                                       | 0.52    | 1.26     | 0.35    |
| Congestive heart failure                 | 1.15              | 0.61    | 2.18     | 0.66    | 0.93             | 0.63    | 1.38     | 0.71    | 0.99                          | 0.66    | 1.48     | 0.96    | 0.86                                                       | 0.55    | 1.34     | 0.49    |
| Hypertension                             | 0.85              | 0.57    | 1.26     | 0.41    | 0.95             | 0.76    | 1.19     | 0.65    | 0.94                          | 0.75    | 1.17     | 0.58    | 0.94                                                       | 0.74    | 1.19     | 0.61    |
| Stroke or transient ischaemic attack     | 0.79              | 0.39    | 1.62     | 0.52    | 1.04             | 0.63    | 1.69     | 0.89    | 1.05                          | 0.63    | 1.75     | 0.84    | 0.69                                                       | 0.39    | 1.23     | 0.21    |
| Diabetes                                 | 1.02              | 0.69    | 1.50     | 0.92    | 1.25             | 1.01    | 1.56     | 0.04    | 1.23                          | 0.98    | 1.54     | 0.07    | 1.22                                                       | 0.96    | 1.56     | 0.10    |
| Cancer                                   | 1.50              | 0.55    | 4.14     | 0.43    | 1.62             | 0.90    | 2.91     | 0.11    | 1.43                          | 0.78    | 2.62     | 0.24    | 1.41                                                       | 0.72    | 2.77     | 0.32    |
| Current smoker                           | 0.75              | 0.37    | 1.54     | 0.44    | 0.59             | 0.35    | 1.01     | 0.06    | 0.59                          | 0.34    | 1.01     | 0.06    | 0.52                                                       | 0.28    | 0.96     | 0.04    |
| Chronic lung disease                     | 0.72              | 0.38    | 1.36     | 0.32    | 0.96             | 0.65    | 1.42     | 0.85    | 0.94                          | 0.63    | 1.40     | 0.75    | 1.02                                                       | 0.66    | 1.57     | 0.93    |
| Active tuberculosis                      | 0.68              | 0.17    | 2.78     | 0.59    | 1.86             | 0.85    | 4.06     | 0.12    | 1.72                          | 0.77    | 3.86     | 0.19    | 1.88                                                       | 0.81    | 4.38     | 0.14    |
| Chronic liver disease                    | 5.62              | 1.73    | 18.27    | 0.004   | 3.48             | 1.48    | 8.18     | 0.004   | 3.38                          | 1.43    | 8.00     | 0.01    | 3.18                                                       | 1.28    | 7.86     | 0.01    |
| HIV/AIDS                                 | 2.48              | 1.21    | 5.07     | 0.01    | 1.91             | 1.31    | 2.79     | <0.001  | 1.89                          | 1.28    | 2.77     | 0.001   | 1.80                                                       | 1.19    | 2.72     | 0.01    |
| Chronic malaria/ malaria within 3 months | 1.45              | 0.42    | 5.03     | 0.55    | 1.06             | 0.52    | 2.15     | 0.88    | 1.08                          | 0.51    | 2.27     | 0.84    | 1.21                                                       | 0.57    | 2.56     | 0.61    |
| Chronic kidney disease                   | 1.37              | 0.73    | 2.56     | 0.33    | 1.89             | 1.28    | 2.78     | 0.001   | 1.83                          | 1.24    | 2.71     | 0.002   | 1.85                                                       | 1.21    | 2.83     | 0.005   |

|                                                                             |           |      |       |        |       |      |       |        |       |      |       |        |       |       |       |        |
|-----------------------------------------------------------------------------|-----------|------|-------|--------|-------|------|-------|--------|-------|------|-------|--------|-------|-------|-------|--------|
| <b>Cardiorespiratory arrest in 24 hours prior to critical care referral</b> | 1.53      | 0.48 | 4.85  | 0.47   | 4.43  | 2.25 | 8.73  | <0.001 | 4.34  | 2.20 | 8.57  | <0.001 | 4.99  | 2.44  | 10.22 | <0.001 |
| <i>Quick SOFA score</i>                                                     |           |      |       |        |       |      |       |        |       |      |       |        |       |       |       |        |
| <b>0 risk factor</b>                                                        | Reference |      |       |        |       |      |       |        |       |      |       |        |       |       |       |        |
| <b>1 risk factor</b>                                                        | 1.75      | 0.87 | 3.51  | 0.12   | 1.44  | 1.01 | 2.04  | 0.04   | 1.37  | 0.96 | 1.97  | 0.08   | 1.37  | 0.92  | 2.04  | 0.12   |
| <b>2 risk factors</b>                                                       | 2.97      | 1.40 | 6.26  | 0.004  | 2.00  | 1.33 | 2.99  | <0.001 | 1.96  | 1.30 | 2.96  | 0.002  | 1.86  | 1.18  | 2.92  | 0.01   |
| <b>3 risk factors</b>                                                       | 7.08      | 2.69 | 18.64 | <0.001 | 3.66  | 2.12 | 6.33  | <0.001 | 3.74  | 2.14 | 6.56  | <0.001 | 3.40  | 1.87  | 6.17  | <0.001 |
| <b>Admission delayed due to lack of resources (e.g. bed, staffing etc)</b>  | 2.07      | 1.11 | 3.84  | 0.02   | 2.14  | 1.42 | 3.22  | <0.001 | 2.21  | 1.45 | 3.37  | <0.001 | 2.29  | 1.46  | 3.60  | <0.001 |
| <b>Physician available on site 24/7 for patient</b>                         | 0.98      | 0.44 | 2.19  | 0.96   | 0.84  | 0.50 | 1.42  | 0.51   | 0.81  | 0.47 | 1.38  | 0.43   | 0.97  | 0.50  | 1.86  | 0.93   |
| <b>Nurse to patient ratio</b>                                               | 1.28      | 0.93 | 1.76  | 0.13   | 1.31  | 0.98 | 1.74  | 0.07   | 1.27  | 0.95 | 1.70  | 0.10   | 1.56  | 1.09  | 2.25  | 0.02   |
| <i>Respiratory support</i>                                                  |           |      |       |        |       |      |       |        |       |      |       |        |       |       |       |        |
| <b>None</b>                                                                 | Reference |      |       |        |       |      |       |        |       |      |       |        |       |       |       |        |
| <b>Oxygen mask</b>                                                          | 1.17      | 0.46 | 2.97  | 0.75   | 1.28  | 0.74 | 2.20  | 0.37   | 1.31  | 0.75 | 2.28  | 0.35   | 1.33  | 0.72  | 2.45  | 0.37   |
| <b>High flow nasal oxygenation</b>                                          | 1.19      | 0.43 | 3.29  | 0.74   | 2.72  | 1.46 | 5.08  | 0.002  | 2.71  | 1.43 | 5.15  | 0.001  | 2.57  | 1.23  | 5.36  | 0.01   |
| <b>CPAP</b>                                                                 | 3.63      | 1.35 | 9.72  | 0.01   | 3.93  | 2.13 | 7.26  | <0.001 | 3.92  | 2.09 | 7.36  | <0.001 | 4.06  | 2.02  | 8.18  | <0.001 |
| <b>Invasive mechanical ventilation</b>                                      | 14.56     | 5.68 | 37.28 | <0.001 | 15.27 | 8.51 | 27.37 | <0.001 | 15.35 | 8.43 | 27.95 | <0.001 | 20.89 | 10.75 | 40.61 | <0.001 |
| <i>Organ systems requiring support at admission</i>                         |           |      |       |        |       |      |       |        |       |      |       |        |       |       |       |        |
| <b>No organ system</b>                                                      | Reference |      |       |        |       |      |       |        |       |      |       |        |       |       |       |        |
| <b>One organ system</b>                                                     | 0.88      | 0.31 | 2.46  | 0.80   | 0.93  | 0.56 | 1.52  | 0.76   | 1.01  | 0.60 | 1.69  | 0.98   | 0.95  | 0.55  | 1.64  | 0.86   |
| <b>Two organ systems</b>                                                    | 1.21      | 0.40 | 3.67  | 0.74   | 0.93  | 0.54 | 1.58  | 0.78   | 0.97  | 0.56 | 1.69  | 0.93   | 0.91  | 0.51  | 1.63  | 0.75   |
| <b>Three organ systems</b>                                                  | 1.69      | 0.49 | 5.81  | 0.40   | 1.49  | 0.76 | 2.93  | 0.25   | 1.71  | 0.85 | 3.44  | 0.14   | 1.56  | 0.75  | 3.28  | 0.24   |
| <b>Four organ systems</b>                                                   | 1.20      | 0.22 | 6.73  | 0.83   | 2.99  | 0.88 | 10.18 | 0.08   | 2.97  | 0.87 | 10.20 | 0.08   | 3.30  | 0.83  | 13.12 | 0.09   |
| <i>Prone ventilation</i>                                                    |           |      |       |        |       |      |       |        |       |      |       |        |       |       |       |        |
| <b>No proning</b>                                                           | Reference |      |       |        |       |      |       |        |       |      |       |        |       |       |       |        |
| <b>On spontaneous ventilation</b>                                           | 0.58      | 0.35 | 0.95  | 0.03   | 0.82  | 0.61 | 1.09  | 0.17   | 0.85  | 0.63 | 1.14  | 0.27   | 0.91  | 0.66  | 1.25  | 0.56   |
| <b>Invasive mechanical ventilation</b>                                      | 1.24      | 0.65 | 2.35  | 0.52   | 1.42  | 0.88 | 2.30  | 0.15   | 1.38  | 0.85 | 2.24  | 0.18   | 1.22  | 0.75  | 1.98  | 0.42   |
| <b>Inotropes/ vasoconstrictors</b>                                          | 4.90      | 3.04 | 7.89  | <0.001 | 3.67  | 2.77 | 4.86  | <0.001 | 3.57  | 2.68 | 4.75  | <0.001 | 3.80  | 2.81  | 5.15  | <0.001 |
| <b>Therapeutic anticoagulation</b>                                          | 1.18      | 0.67 | 2.07  | 0.58   | 1.18  | 0.85 | 1.63  | 0.33   | 1.17  | 0.84 | 1.63  | 0.35   | 1.27  | 0.90  | 1.80  | 0.18   |
| <b>Steroid therapy</b>                                                      | 0.77      | 0.40 | 1.47  | 0.43   | 0.55  | 0.37 | 0.81  | 0.003  | 0.52  | 0.35 | 0.79  | 0.002  | 0.50  | 0.32  | 0.77  | 0.002  |

CI=confidence interval CPAP=continuous positive airway pressure HIV=human immunodeficiency virus AIDS=acquired immunodeficiency syndrome SOFA=sequential organ failure assessment score

**Supplementary Material S6. Sensitivity analysis 2: Generalised linear mixed model with full dataset for mortality. Control are patients alive and discharged.**

| Dataset                                                              | Original (n=1299) |         |          |         | Imputed (n=3140) |         |          |         | Imputed (n=2995)              |         |          |         | Imputed (n=2710)                                           |         |          |         |
|----------------------------------------------------------------------|-------------------|---------|----------|---------|------------------|---------|----------|---------|-------------------------------|---------|----------|---------|------------------------------------------------------------|---------|----------|---------|
| Sensitivity                                                          | Full dataset      |         |          |         | Full dataset     |         |          |         | Confirmed SARS-CoV-2 positive |         |          |         | Confirmed SARS-CoV-2 positive and no limitation of therapy |         |          |         |
|                                                                      | Odds ratio        | 2-5% CI | 97-5% CI | p-value | Odds ratio       | 2-5% CI | 97-5% CI | p-value | Odds ratio                    | 2-5% CI | 97-5% CI | p-value | Odds ratio                                                 | 2-5% CI | 97-5% CI | p-value |
| Intercept                                                            | 0.00              | 0.00    | 0.03     | <0.001  | 0.02             | 0.00    | 0.05     | <0.001  | 0.01                          | 0.00    | 0.05     | <0.001  | 0.01                                                       | 0.00    | 0.04     | <0.001  |
| Age (years)                                                          | 1.04              | 1.03    | 1.06     | <0.001  | 1.03             | 1.03    | 1.04     | <0.001  | 1.03                          | 1.03    | 1.04     | <0.001  | 1.03                                                       | 1.02    | 1.04     | <0.001  |
| Male                                                                 | 0.78              | 0.51    | 1.18     | 0.23    | 0.86             | 0.68    | 1.09     | 0.21    | 0.88                          | 0.70    | 1.12     | 0.31    | 0.83                                                       | 0.64    | 1.07     | 0.14    |
| <i>Body mass index</i>                                               |                   |         |          |         |                  |         |          |         |                               |         |          |         |                                                            |         |          |         |
| <25                                                                  | Reference         |         |          |         |                  |         |          |         |                               |         |          |         |                                                            |         |          |         |
| 25-29.9                                                              | 1.37              | 0.80    | 2.35     | 0.25    | 1.19             | 0.80    | 1.75     | 0.37    | 1.18                          | 0.80    | 1.74     | 0.39    | 1.21                                                       | 0.79    | 1.84     | 0.37    |
| 30-34.9                                                              | 1.47              | 0.77    | 2.80     | 0.24    | 1.04             | 0.69    | 1.57     | 0.85    | 1.05                          | 0.70    | 1.58     | 0.81    | 0.99                                                       | 0.60    | 1.61     | 0.96    |
| 35-39.9                                                              | 1.22              | 0.52    | 2.88     | 0.64    | 1.02             | 0.61    | 1.72     | 0.94    | 1.02                          | 0.61    | 1.71     | 0.93    | 1.09                                                       | 0.61    | 1.94     | 0.77    |
| >40                                                                  | 2.02              | 0.83    | 4.93     | 0.12    | 1.10             | 0.59    | 2.03     | 0.76    | 1.07                          | 0.55    | 2.08     | 0.83    | 1.08                                                       | 0.54    | 2.15     | 0.81    |
| Coronary artery disease                                              | 0.65              | 0.31    | 1.39     | 0.27    | 0.71             | 0.46    | 1.09     | 0.12    | 0.73                          | 0.47    | 1.13     | 0.15    | 0.69                                                       | 0.43    | 1.12     | 0.14    |
| Congestive heart failure                                             | 1.21              | 0.58    | 2.50     | 0.62    | 0.89             | 0.58    | 1.37     | 0.61    | 0.92                          | 0.59    | 1.41     | 0.69    | 0.78                                                       | 0.48    | 1.27     | 0.32    |
| Hypertension                                                         | 0.86              | 0.55    | 1.36     | 0.52    | 1.02             | 0.80    | 1.30     | 0.87    | 1.01                          | 0.79    | 1.29     | 0.95    | 1.00                                                       | 0.77    | 1.30     | 0.99    |
| Stroke or transient ischaemic attack                                 | 1.07              | 0.47    | 2.44     | 0.87    | 1.59             | 0.91    | 2.77     | 0.10    | 1.66                          | 0.94    | 2.94     | 0.08    | 1.12                                                       | 0.59    | 2.12     | 0.73    |
| Diabetes                                                             | 1.13              | 0.73    | 1.76     | 0.58    | 1.32             | 1.04    | 1.69     | 0.02    | 1.29                          | 1.01    | 1.65     | 0.04    | 1.30                                                       | 1.00    | 1.70     | 0.05    |
| Cancer                                                               | 1.88              | 0.50    | 6.99     | 0.35    | 2.04             | 1.05    | 3.98     | 0.04    | 1.83                          | 0.92    | 3.63     | 0.08    | 1.71                                                       | 0.80    | 3.64     | 0.16    |
| Current smoker                                                       | 0.51              | 0.22    | 1.20     | 0.12    | 0.60             | 0.33    | 1.09     | 0.09    | 0.60                          | 0.33    | 1.10     | 0.10    | 0.57                                                       | 0.29    | 1.14     | 0.11    |
| Chronic lung disease                                                 | 0.90              | 0.41    | 1.96     | 0.79    | 0.98             | 0.64    | 1.51     | 0.94    | 0.97                          | 0.63    | 1.51     | 0.90    | 1.10                                                       | 0.68    | 1.78     | 0.69    |
| Active tuberculosis                                                  | 0.76              | 0.14    | 4.03     | 0.75    | 2.61             | 1.07    | 6.38     | 0.03    | 2.48                          | 0.98    | 6.32     | 0.06    | 2.77                                                       | 1.06    | 7.21     | 0.04    |
| Chronic liver disease                                                | 10.66             | 2.62    | 43.28    | <0.001  | 4.11             | 1.61    | 10.47    | 0.003   | 4.00                          | 1.56    | 10.28    | 0.004   | 3.78                                                       | 1.43    | 10.04    | 0.01    |
| HIV/AIDS                                                             | 2.04              | 0.93    | 4.50     | 0.08    | 1.83             | 1.21    | 2.75     | 0.004   | 1.81                          | 1.20    | 2.75     | 0.005   | 1.71                                                       | 1.10    | 2.67     | 0.02    |
| Chronic malaria/ malaria within 3 months                             | 0.98              | 0.30    | 3.27     | 0.98    | 1.06             | 0.48    | 2.35     | 0.89    | 1.12                          | 0.49    | 2.55     | 0.78    | 1.22                                                       | 0.54    | 2.76     | 0.63    |
| Chronic kidney disease                                               | 1.04              | 0.52    | 2.08     | 0.92    | 1.70             | 1.12    | 2.57     | 0.01    | 1.65                          | 1.09    | 2.51     | 0.02    | 1.68                                                       | 1.06    | 2.65     | 0.03    |
| Cardiorespiratory arrest in 24 hours prior to critical care referral | 1.30              | 0.35    | 4.80     | 0.69    | 4.07             | 1.97    | 8.42     | <0.001  | 4.01                          | 1.93    | 8.30     | <0.001  | 4.52                                                       | 2.09    | 9.79     | <0.001  |
| <i>Quick SOFA score</i>                                              |                   |         |          |         |                  |         |          |         |                               |         |          |         |                                                            |         |          |         |

|                                                                            |           |       |       |        |       |       |       |        |       |       |       |        |       |       |       |        |
|----------------------------------------------------------------------------|-----------|-------|-------|--------|-------|-------|-------|--------|-------|-------|-------|--------|-------|-------|-------|--------|
| <b>0 risk factor</b>                                                       | Reference |       |       |        |       |       |       |        |       |       |       |        |       |       |       |        |
| <b>1 risk factor</b>                                                       | 1·67      | 0·78  | 3·58  | 0·19   | 1·41  | 0·96  | 2·07  | 0·08   | 1·36  | 0·92  | 2·00  | 0·12   | 1·33  | 0·87  | 2·02  | 0·18   |
| <b>2 risk factors</b>                                                      | 4·81      | 2·12  | 10·90 | <0·001 | 2·39  | 1·53  | 3·72  | <0·001 | 2·33  | 1·49  | 3·64  | <0·001 | 2·25  | 1·38  | 3·67  | 0·001  |
| <b>3 risk factors</b>                                                      | 4·79      | 1·65  | 13·92 | 0·004  | 4·05  | 2·19  | 7·49  | <0·001 | 4·42  | 2·35  | 8·30  | <0·001 | 4·04  | 2·08  | 7·84  | <0·001 |
| <b>Admission delayed due to lack of resources (e.g. bed, staffing etc)</b> | 2·27      | 1·15  | 4·50  | 0·02   | 2·01  | 1·29  | 3·15  | 0·002  | 2·14  | 1·35  | 3·39  | 0·001  | 2·22  | 1·37  | 3·59  | 0·001  |
| <b>Physician available on site 24/7 for patient</b>                        | 0·92      | 0·39  | 2·19  | 0·85   | 0·66  | 0·37  | 1·19  | 0·17   | 0·65  | 0·36  | 1·17  | 0·15   | 0·84  | 0·40  | 1·75  | 0·64   |
| <b>Nurse to patient ratio</b>                                              | 1·30      | 0·90  | 1·87  | 0·16   | 1·39  | 0·98  | 1·98  | 0·06   | 1·38  | 0·97  | 1·96  | 0·08   | 1·58  | 1·04  | 2·41  | 0·03   |
| <i>Respiratory support</i>                                                 |           |       |       |        |       |       |       |        |       |       |       |        |       |       |       |        |
| <b>None</b>                                                                | Reference |       |       |        |       |       |       |        |       |       |       |        |       |       |       |        |
| <b>Oxygen mask</b>                                                         | 1·30      | 0·46  | 3·67  | 0·62   | 1·36  | 0·75  | 2·46  | 0·31   | 1·35  | 0·73  | 2·48  | 0·33   | 1·35  | 0·70  | 2·63  | 0·37   |
| <b>High flow nasal oxygenation</b>                                         | 1·93      | 0·63  | 5·92  | 0·25   | 3·43  | 1·74  | 6·76  | <0·001 | 3·28  | 1·64  | 6·57  | <0·001 | 2·81  | 1·27  | 6·18  | 0·01   |
| <b>CPAP</b>                                                                | 4·79      | 1·59  | 14·39 | 0·01   | 4·85  | 2·47  | 9·51  | <0·001 | 4·64  | 2·33  | 9·24  | <0·001 | 4·57  | 2·13  | 9·78  | <0·001 |
| <b>Invasive mechanical ventilation</b>                                     | 31·89     | 10·90 | 93·26 | <0·001 | 24·63 | 12·82 | 47·31 | <0·001 | 23·86 | 12·26 | 46·42 | <0·001 | 33·48 | 16·00 | 70·03 | <0·001 |
| <i>Organ systems requiring support at admission</i>                        |           |       |       |        |       |       |       |        |       |       |       |        |       |       |       |        |
| <b>No organ system</b>                                                     | Reference |       |       |        |       |       |       |        |       |       |       |        |       |       |       |        |
| <b>One organ system</b>                                                    | 0·75      | 0·24  | 2·34  | 0·62   | 0·93  | 0·54  | 1·59  | 0·79   | 1·00  | 0·58  | 1·75  | 0·99   | 0·96  | 0·54  | 1·71  | 0·88   |
| <b>Two organ systems</b>                                                   | 1·14      | 0·33  | 3·89  | 0·83   | 0·86  | 0·49  | 1·53  | 0·62   | 0·90  | 0·50  | 1·62  | 0·71   | 0·87  | 0·47  | 1·62  | 0·66   |
| <b>Three organ systems</b>                                                 | 1·34      | 0·34  | 5·29  | 0·68   | 1·22  | 0·58  | 2·56  | 0·59   | 1·38  | 0·65  | 2·95  | 0·40   | 1·29  | 0·58  | 2·86  | 0·53   |
| <b>Four organ systems</b>                                                  | 0·75      | 0·10  | 5·91  | 0·79   | 2·87  | 0·66  | 12·47 | 0·16   | 3·06  | 0·69  | 13·52 | 0·14   | 3·97  | 0·69  | 23·00 | 0·12   |
| <i>Prone ventilation</i>                                                   |           |       |       |        |       |       |       |        |       |       |       |        |       |       |       |        |
| <b>No proning</b>                                                          | Reference |       |       |        |       |       |       |        |       |       |       |        |       |       |       |        |
| <b>On spontaneous ventilation</b>                                          | 0·67      | 0·39  | 1·16  | 0·16   | 0·78  | 0·57  | 1·07  | 0·13   | 0·82  | 0·59  | 1·13  | 0·21   | 0·88  | 0·62  | 1·25  | 0·48   |
| <b>Invasive mechanical ventilation</b>                                     | 2·63      | 1·15  | 5·99  | 0·02   | 1·82  | 1·03  | 3·22  | 0·04   | 1·81  | 1·02  | 3·23  | 0·04   | 1·69  | 0·93  | 3·05  | 0·08   |
| <b>Inotropes/ vasoconstrictors</b>                                         | 6·90      | 3·83  | 12·43 | <0·001 | 4·43  | 3·20  | 6·11  | <0·001 | 4·31  | 3·10  | 5·99  | <0·001 | 4·57  | 3·23  | 6·46  | <0·001 |
| <b>Therapeutic anticoagulation</b>                                         | 1·26      | 0·66  | 2·42  | 0·48   | 1·15  | 0·79  | 1·67  | 0·46   | 1·13  | 0·78  | 1·65  | 0·51   | 1·22  | 0·82  | 1·81  | 0·33   |
| <b>Steroid therapy</b>                                                     | 0·65      | 0·32  | 1·32  | 0·23   | 0·50  | 0·33  | 0·75  | 0·001  | 0·49  | 0·32  | 0·75  | 0·001  | 0·46  | 0·29  | 0·73  | 0·001  |

CI=confidence interval CPAP=continuous positive airway pressure HIV=human immunodeficiency virus AIDS=acquired immunodeficiency syndrome SOFA=sequential organ failure assessment score



**Supplementary Material S7. Sensitivity analysis 3: Generalised linear mixed model with full dataset for mortality. Variable ‘cardiorespiratory arrest in 24 hours before admission’ not entered into the GLMM.**

| Dataset                                  | Imputed (n=3140)                                                     |         |          |         | Imputed (n=3140)                               |         |          |         |
|------------------------------------------|----------------------------------------------------------------------|---------|----------|---------|------------------------------------------------|---------|----------|---------|
| Sensitivity                              | Full dataset<br>(Control alive in hospital and alive and discharged) |         |          |         | Full dataset<br>(Control alive and discharged) |         |          |         |
|                                          | Odds ratio                                                           | 2.5% CI | 97.5% CI | p-value | Odds ratio                                     | 2.5% CI | 97.5% CI | p-value |
| Intercept                                | 0.02                                                                 | 0.01    | 0.05     | <0.001  | 0.02                                           | 0.01    | 0.05     | <0.001  |
| Age (years)                              | 1.03                                                                 | 1.02    | 1.04     | <0.001  | 1.03                                           | 1.03    | 1.04     | <0.001  |
| Male                                     | 0.86                                                                 | 0.70    | 1.06     | 0.16    | 0.86                                           | 0.68    | 1.09     | 0.21    |
| <i>Body mass index</i>                   |                                                                      |         |          |         |                                                |         |          |         |
| <25                                      | Reference                                                            |         |          |         |                                                |         |          |         |
| 25-29.9                                  | 1.12                                                                 | 0.77    | 1.63     | 0.53    | 1.19                                           | 0.80    | 1.78     | 0.38    |
| 30-34.9                                  | 1.06                                                                 | 0.73    | 1.52     | 0.76    | 1.05                                           | 0.70    | 1.56     | 0.82    |
| 35-39.9                                  | 1.19                                                                 | 0.77    | 1.85     | 0.44    | 1.05                                           | 0.63    | 1.75     | 0.85    |
| >40                                      | 1.11                                                                 | 0.66    | 1.86     | 0.68    | 1.11                                           | 0.60    | 2.03     | 0.73    |
| Coronary artery disease                  | 0.80                                                                 | 0.54    | 1.18     | 0.26    | 0.70                                           | 0.46    | 1.08     | 0.11    |
| Congestive heart failure                 | 0.94                                                                 | 0.64    | 1.39     | 0.76    | 0.90                                           | 0.59    | 1.38     | 0.62    |
| Hypertension                             | 0.96                                                                 | 0.77    | 1.19     | 0.71    | 1.03                                           | 0.81    | 1.31     | 0.80    |
| Stroke or transient ischaemic attack     | 1.03                                                                 | 0.64    | 1.68     | 0.89    | 1.57                                           | 0.90    | 2.71     | 0.11    |
| Diabetes                                 | 1.24                                                                 | 0.99    | 1.54     | 0.06    | 1.31                                           | 1.03    | 1.66     | 0.03    |
| Cancer                                   | 1.70                                                                 | 0.95    | 3.06     | 0.08    | 2.17                                           | 1.11    | 4.24     | 0.02    |
| Current smoker                           | 0.63                                                                 | 0.37    | 1.07     | 0.09    | 0.64                                           | 0.35    | 1.15     | 0.14    |
| Chronic lung disease                     | 0.94                                                                 | 0.64    | 1.39     | 0.77    | 0.97                                           | 0.63    | 1.49     | 0.88    |
| Active tuberculosis                      | 1.99                                                                 | 0.91    | 4.34     | 0.09    | 2.82                                           | 1.15    | 6.91     | 0.02    |
| Chronic liver disease                    | 3.25                                                                 | 1.39    | 7.59     | 0.01    | 3.81                                           | 1.50    | 9.65     | 0.005   |
| HIV/AIDS                                 | 1.88                                                                 | 1.29    | 2.75     | 0.001   | 1.80                                           | 1.20    | 2.72     | 0.005   |
| Chronic malaria/ malaria within 3 months | 1.08                                                                 | 0.53    | 2.18     | 0.84    | 1.05                                           | 0.48    | 2.30     | 0.91    |
| Chronic kidney disease                   | 1.99                                                                 | 1.35    | 2.92     | <0.001  | 1.81                                           | 1.20    | 2.73     | 0.01    |
| <i>Quick SOFA score</i>                  |                                                                      |         |          |         |                                                |         |          |         |
| 0 risk factor                            | Reference                                                            |         |          |         |                                                |         |          |         |
| 1 risk factor                            | 1.44                                                                 | 1.01    | 2.04     | 0.04    | 1.42                                           | 0.97    | 2.08     | 0.07    |
| 2 risk factors                           | 1.99                                                                 | 1.33    | 2.98     | <0.001  | 2.40                                           | 1.54    | 3.73     | <0.001  |
| 3 risk factors                           | 3.93                                                                 | 2.28    | 6.77     | <0.001  | 4.34                                           | 2.35    | 8.02     | <0.001  |

|                                                                           |           |      |       |        |       |       |       |        |
|---------------------------------------------------------------------------|-----------|------|-------|--------|-------|-------|-------|--------|
| <b>Admission delayed due to lack of resources (e.g. bed staffing etc)</b> | 2.11      | 1.40 | 3.16  | <0.001 | 1.98  | 1.27  | 3.08  | 0.003  |
| <b>Physician available on site 24/7 for patient</b>                       | 0.83      | 0.49 | 1.41  | 0.50   | 0.66  | 0.37  | 1.18  | 0.16   |
| <b>Nurse to patient ratio</b>                                             | 1.30      | 0.98 | 1.74  | 0.07   | 1.37  | 0.97  | 1.95  | 0.07   |
| <i>Respiratory support</i>                                                |           |      |       |        |       |       |       |        |
| <b>None</b>                                                               | Reference |      |       |        |       |       |       |        |
| <b>Oxygen mask</b>                                                        | 1.24      | 0.72 | 2.12  | 0.44   | 1.32  | 0.73  | 2.39  | 0.35   |
| <b>High flow nasal oxygenation</b>                                        | 2.65      | 1.42 | 4.92  | 0.002  | 3.38  | 1.72  | 6.64  | <0.001 |
| <b>CPAP</b>                                                               | 3.82      | 2.08 | 7.04  | <0.001 | 4.74  | 2.42  | 9.28  | <0.001 |
| <b>Invasive mechanical ventilation</b>                                    | 14.75     | 8.26 | 26.32 | <0.001 | 23.84 | 12.47 | 45.58 | <0.001 |
| <i>Organ systems requiring support at admission</i>                       |           |      |       |        |       |       |       |        |
| <b>No organ system</b>                                                    | Reference |      |       |        |       |       |       |        |
| <b>One organ system</b>                                                   | 0.90      | 0.55 | 1.47  | 0.67   | 0.89  | 0.52  | 1.52  | 0.68   |
| <b>Two organ systems</b>                                                  | 0.91      | 0.53 | 1.54  | 0.71   | 0.84  | 0.48  | 1.48  | 0.55   |
| <b>Three organ systems</b>                                                | 1.49      | 0.76 | 2.92  | 0.25   | 1.21  | 0.58  | 2.51  | 0.61   |
| <b>Four organ systems</b>                                                 | 2.88      | 0.86 | 9.67  | 0.09   | 2.76  | 0.64  | 11.85 | 0.17   |
| <i>Prone ventilation</i>                                                  |           |      |       |        |       |       |       |        |
| <b>No proning</b>                                                         | Reference |      |       |        |       |       |       |        |
| <b>On spontaneous ventilation</b>                                         | 0.82      | 0.62 | 1.09  | 0.17   | 0.79  | 0.57  | 1.09  | 0.14   |
| <b>Invasive mechanical ventilation</b>                                    | 1.44      | 0.89 | 2.34  | 0.13   | 1.86  | 1.05  | 3.29  | 0.04   |
| <b>Inotropes/ vasoconstrictors</b>                                        | 3.77      | 2.85 | 4.98  | <0.001 | 4.57  | 3.31  | 6.30  | <0.001 |
| <b>Therapeutic anticoagulation</b>                                        | 1.16      | 0.84 | 1.61  | 0.37   | 1.13  | 0.78  | 1.64  | 0.51   |
| <b>Steroid therapy</b>                                                    | 0.54      | 0.36 | 0.79  | 0.002  | 0.49  | 0.32  | 0.73  | <0.001 |

CI=confidence interval CPAP=continuous positive airway pressure HIV=human immunodeficiency virus AIDS=acquired immunodeficiency syndrome SOFA=sequential organ failure assessment score

## Supplementary Material S8. Search Strategy For COVID-19 Critical Care Mortality Meta-Analysis

|    |                                                                                                                                                        |
|----|--------------------------------------------------------------------------------------------------------------------------------------------------------|
| 1  | (Betacoronavirus OR Betacoronaviruses)                                                                                                                 |
| 2  | (Corona Virus OR Corona Viruses OR Coronavirus OR Coronaviruses)                                                                                       |
| 3  | (COVID OR COVID19 OR COVID-19)                                                                                                                         |
| 4  | (CoV OR CoV2 OR HCoV-19 OR nCoV OR 2019nCoV)                                                                                                           |
| 5  | (Severe Acute Respiratory Syndrome CoV OR severe acute respiratory syndrome coronavirus 2 OR SARS CoV 2 OR SARS-CoV-2 OR SARSCoV OR SARS-CoV OR SARS2) |
| 6  | (Intensive care OR intensive care unit* OR ICU*)                                                                                                       |
| 7  | (ITU* or intensive treatment* OR intensive treatment unit*)                                                                                            |
| 8  | critical care.                                                                                                                                         |
| 9  | critical* ill*                                                                                                                                         |
| 10 | 1 or 2 or 3 or 4 or 5                                                                                                                                  |
| 11 | 6 or 7 or 8 or 9                                                                                                                                       |
| 12 | 10 and 11                                                                                                                                              |
| 13 | Limit 12 to yr= "2020"                                                                                                                                 |

### Databases used in the literature search:

MEDLINE via Ovid (*ab,ti*), Embase via Ovid (*ab,ti*), Cochrane Library (*ab,ti,kw*), *Africa-Wide Information* via EBSCOhost (*af*), *SciELO Citation Index* via *Web of Science* (*ab,ti,au,kw*).

### Search date:

Original search: 1st January 2020 to 23rd September 2020.  
Updated search: 23<sup>rd</sup> September 2020 to 6<sup>th</sup> December 2020.

### Meta-Analysis Protocol:

PROSPERO CRD42020212347

**Supplementary Material S9. PRISMA Flow Diagram For COVID-19 Critical Care Mortality Meta-Analysis**

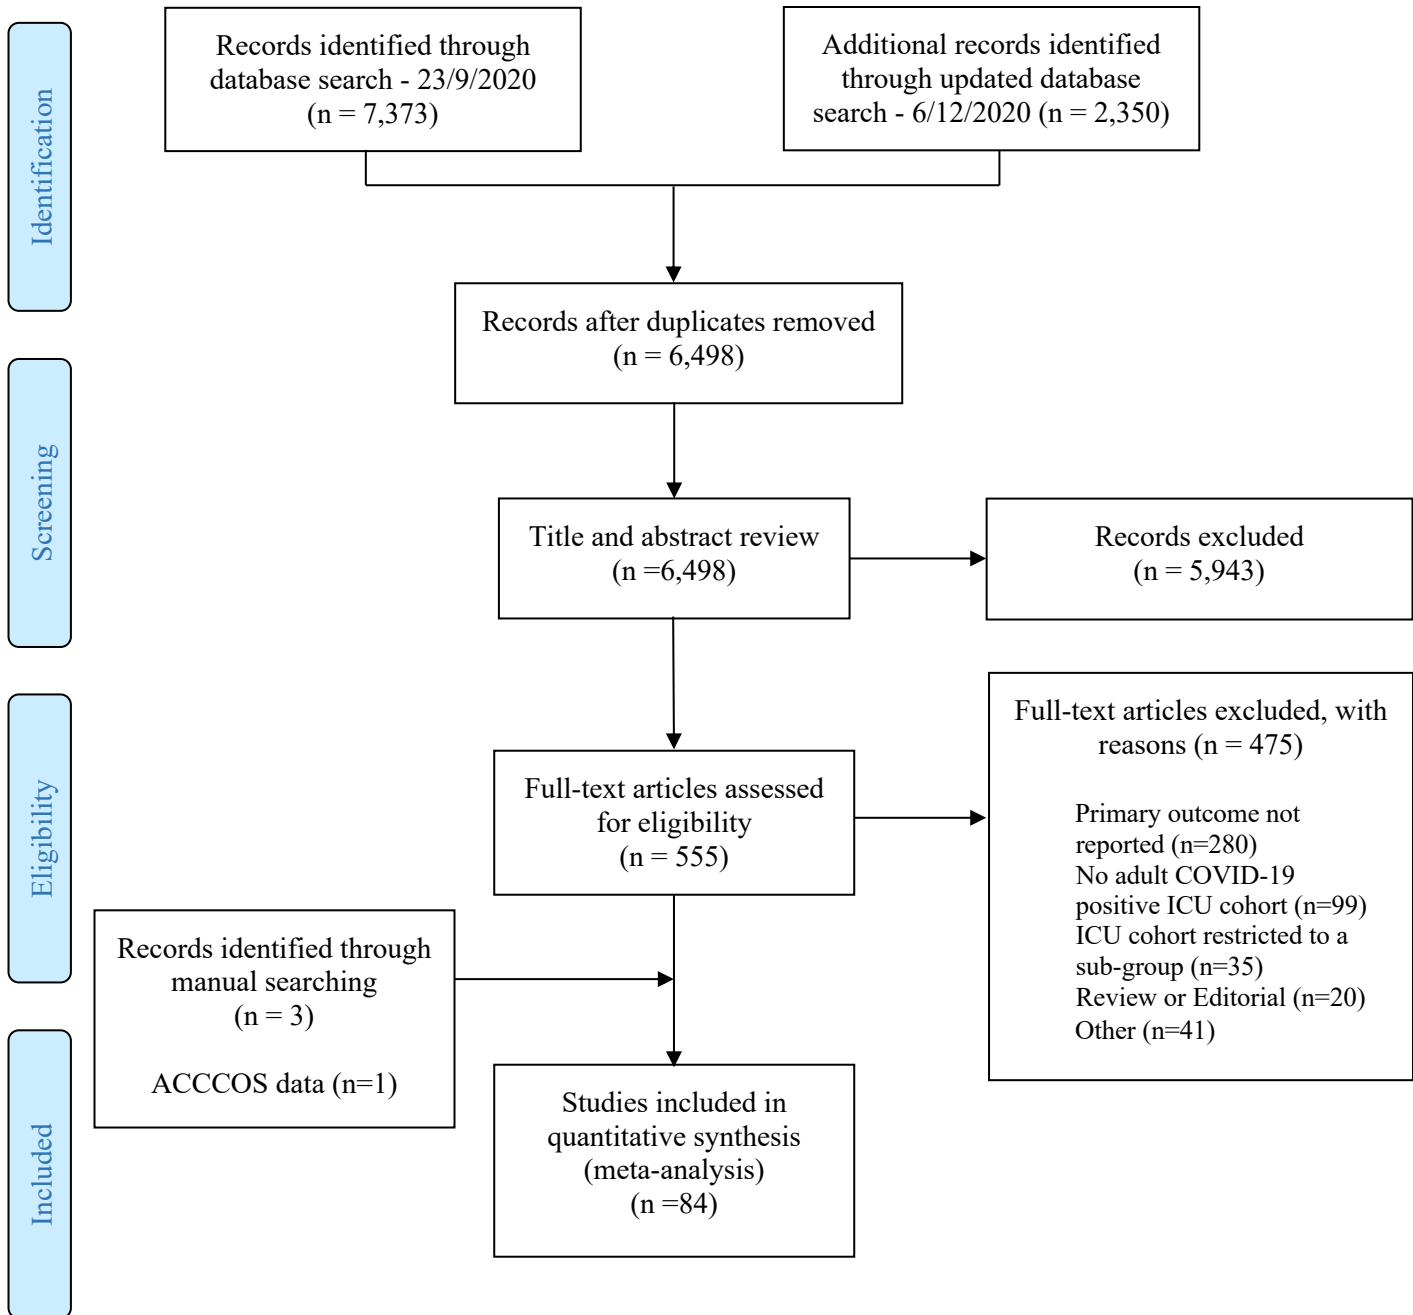

# Supplementary Material S10. Meta-Analysis of definitive COVID-19 Critical Care Outcomes

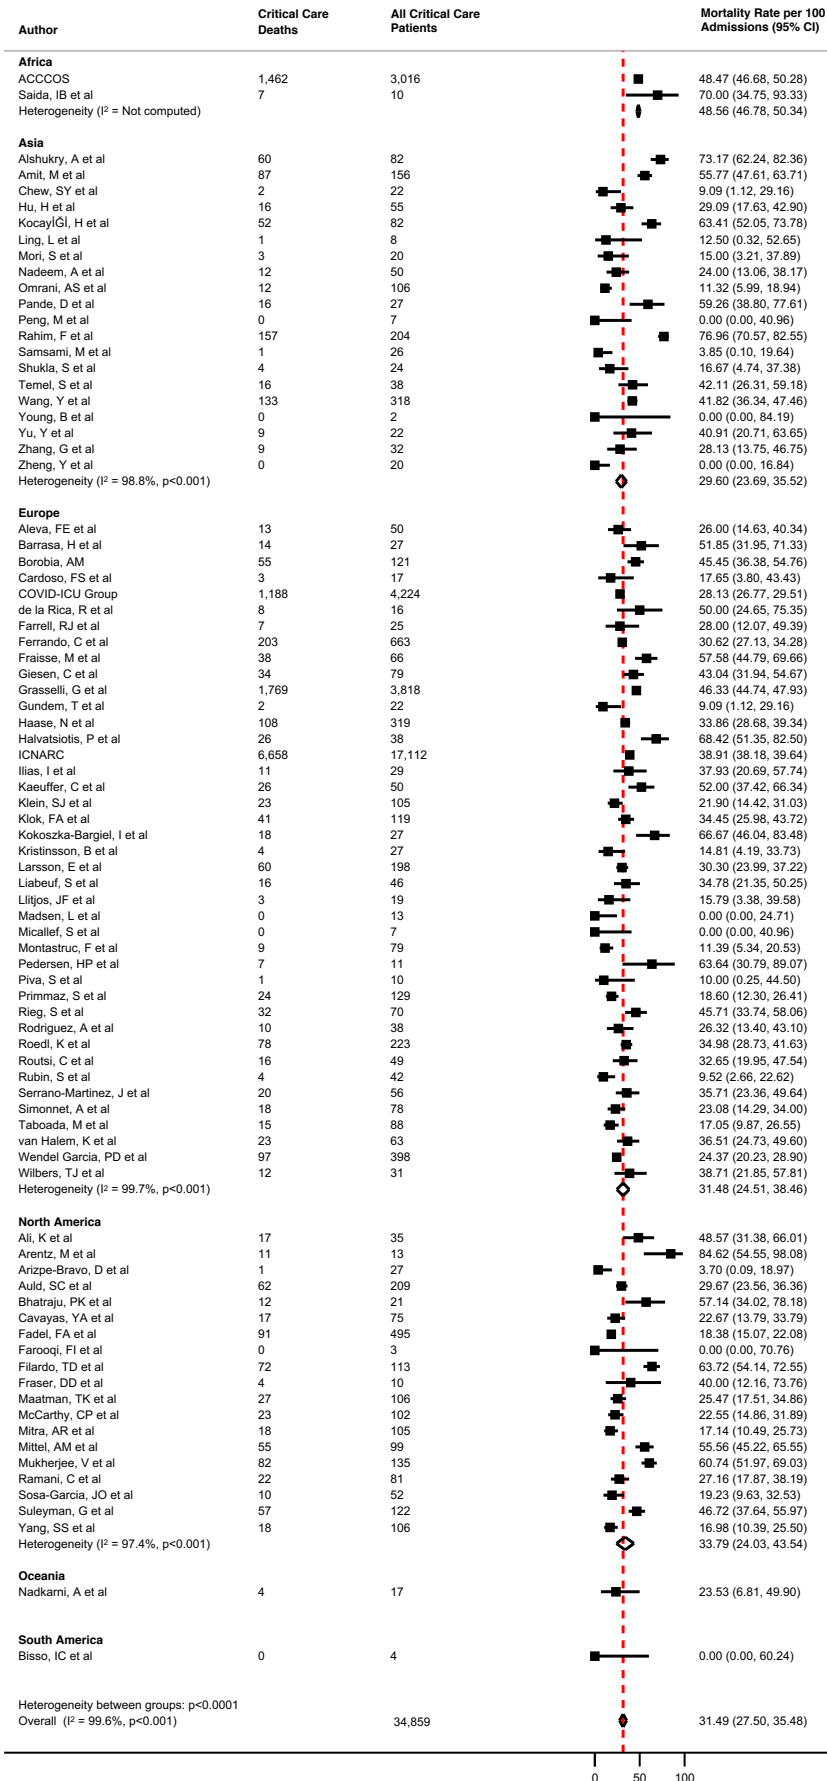

### Supplementary Material S11. Excess COVID-19 critical care mortality in Africa

|                  | <b>2·5% CI</b> | <b>97·5% CI</b> | <b>Africa<br/>2·5% CI</b> | <b>Africa<br/>97·5% CI</b> | <b>Best case<br/>scenario</b> | <b>Worst case<br/>scenario</b> |
|------------------|----------------|-----------------|---------------------------|----------------------------|-------------------------------|--------------------------------|
| Global           | 27·5           | 35·5            | 46·8                      | 50·3                       | 11·3                          | 22·8                           |
| Asia             | 23·7           | 35·5            | 46·8                      | 50·3                       | 11·3                          | 26·6                           |
| Europe           | 24·5           | 38·5            | 46·8                      | 50·3                       | 8·3                           | 25·8                           |
| North<br>America | 24             | 43·5            | 46·8                      | 50·3                       | 3·3                           | 26·3                           |

CI confidence interval

Data source: Meta-analysis Supplementary Material S10

Methodology: ‘Best case scenario’ assumes that the true mortality of the non-African region is represented by the upper confidence interval for mortality, and the true mortality in Africa is represented by the lower confidence interval for mortality. ‘Worst case scenario’ assumes that the true mortality of the non-African region is represented by the lower confidence interval for mortality, and the true mortality in Africa is represented by the upper confidence interval for mortality.

# Supplementary Material S12. Meta-Analysis of mean ‘age’ of definitive COVID-19 Critical Care Outcomes studies

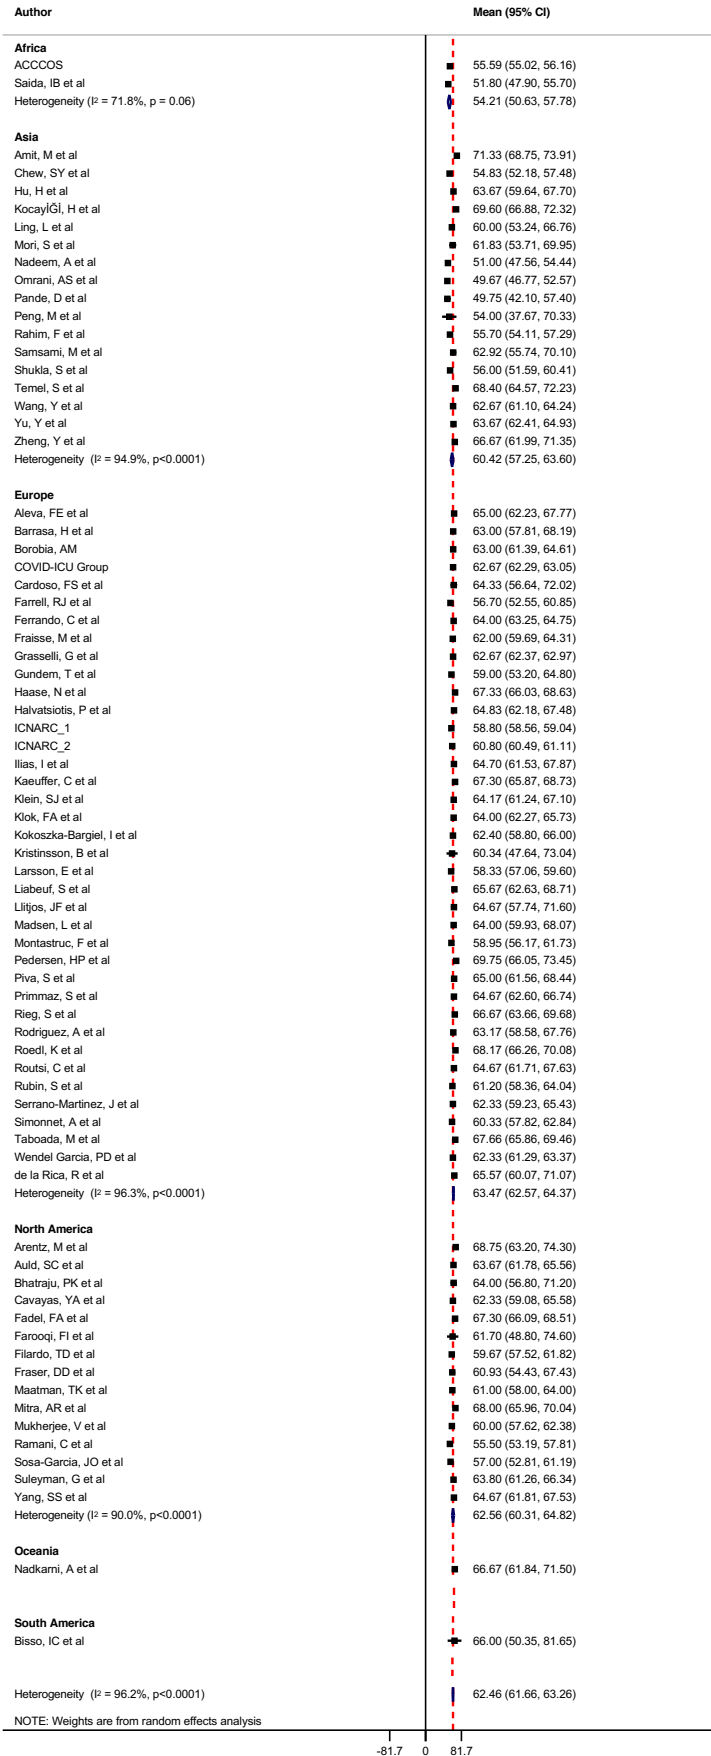

### Supplementary Material S13. Meta-Analysis of mean ‘SOFA score’ of definitive COVID-19 Critical Care Outcomes studies

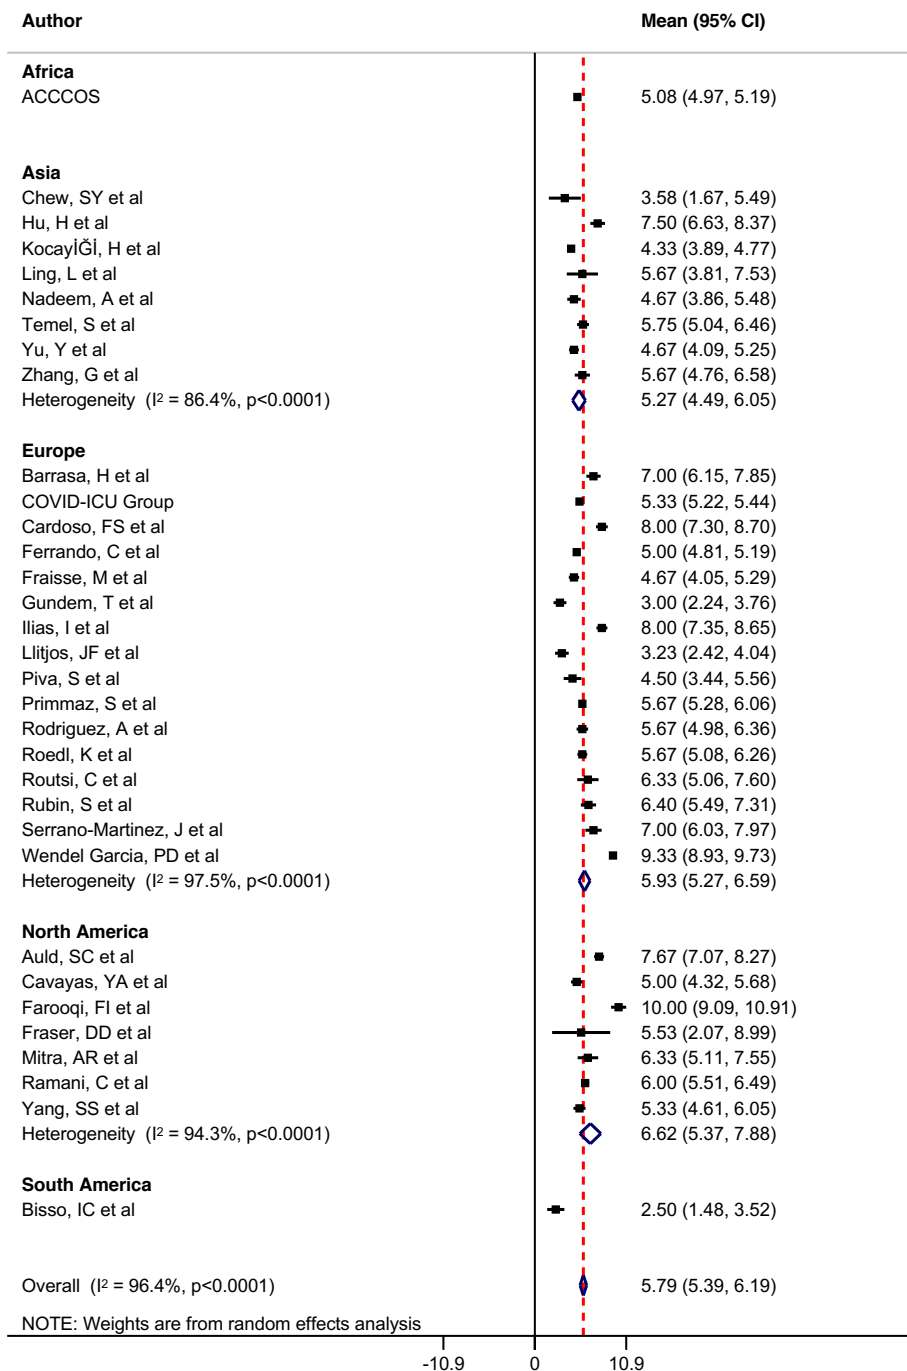



### Supplementary Material S14. COVID-19 Critical Care Mortality Meta-Analysis Summary Table

| First author (surname, initial)            | Sites    | Country              | Region      | Cohort type   | Recruitment start (date) | Recruitment end (date) | Final follow-up (date) | Age (years)        | Sequential Organ Failure Assessment (SOFA) Score | Total patients in Critical Care cohort (n) | Alive Critical Care discharge (n) | In Critical Care mortality (n) |
|--------------------------------------------|----------|----------------------|-------------|---------------|--------------------------|------------------------|------------------------|--------------------|--------------------------------------------------|--------------------------------------------|-----------------------------------|--------------------------------|
| Mean (SD); Median (IQR)*; Median (range)** |          |                      |             |               |                          |                        |                        |                    |                                                  |                                            |                                   |                                |
| <b>AFRICA</b>                              |          |                      |             |               |                          |                        |                        |                    |                                                  |                                            |                                   |                                |
| ACCCOS                                     | Multiple | Continental          | -           | Prospective   | 07/05/20                 | 18/12/20               | 18/12/20               | 55.59 (16.11)      | 5.08 (3.21)                                      | 3085                                       | 1554                              | 1462                           |
| Saida, IB et al <sup>1</sup>               | Single   | Tunisia              | Sousse      | Retrospective | 11/03/20                 | 07/05/20               | 07/05/20               | 51.8 (6.3)         | -                                                | 10                                         | 3                                 | 7                              |
| <b>ASIA</b>                                |          |                      |             |               |                          |                        |                        |                    |                                                  |                                            |                                   |                                |
| Alshukry, A et al <sup>2</sup>             | Single   | Kuwait               | Kuwait City | Retrospective | 24/02/20                 | 24/05/20               | 24/05/20               | -                  | -                                                | 82                                         | 22                                | 60                             |
| Amit M, et al <sup>3</sup>                 | Multiple | Israel               | National    | Retrospective | 05/03/20                 | 27/04/20               | 08/05/20               | 72 (60-82)*        | -                                                | 156                                        | 69                                | 87                             |
| Chew, SY et al <sup>4</sup>                | Single   | Singapore            | -           | Retrospective | 07/02/20                 | 07/06/20               | 30/06/20               | 54.5 (51-59)*      | 2.5 (1.25-7)*                                    | 22                                         | 20                                | 2                              |
| Hu, H et al <sup>5</sup>                   | Single   | China                | Hubei       | Retrospective | 08/01/20                 | 12/03/20               | 12/03/20               | 63 (54-74)*        | 7.5 (3.3)                                        | 55                                         | 39                                | 16                             |
| Kocaylğlı, H et al <sup>6</sup>            | Single   | Turkey               | Sakarya     | Unclear       | 19/03/20                 | 13/04/20               | 18/04/20               | 69.6 (14.1)        | 4 (3-6)*                                         | 103                                        | 30                                | 52                             |
| Ling, L et al <sup>7</sup>                 | Multiple | Hong Kong            | National    | Retrospective | 22/01/20                 | 11/02/20               | 09/03/20               | 64 (42-70)**       | 6 (4-7)*                                         | 8                                          | 7                                 | 1                              |
| Mori, S et al <sup>8</sup>                 | Single   | Japan                | Tokyo       | Retrospective | 10/03/20                 | 02/06/20               | 28/06/20               | 58 (51.5-76)*      | -                                                | 22                                         | 17                                | 3                              |
| Nadeem, A et al <sup>9</sup>               | Single   | United Arab Emirates | Abu Dhabi   | Retrospective | 31/03/20                 | 10/05/20               | 20/06/20               | 51 (13)            | 4 (3-7)*                                         | 55                                         | 38                                | 12                             |
| Omri, AS et al <sup>10</sup>               | Multiple | Qatar                | National    | Retrospective | 28/02/20                 | 17/04/20               | 17/06/20               | 49.5 (39.5-60)     | -                                                | 108                                        | 94                                | 12                             |
| Pande, D et al <sup>11</sup>               | Single   | India                | New Delhi   | Unclear       | 20/04/20                 | 03/05/20               | Discharge              | 50 (9-90)**        | -                                                | 27                                         | 11                                | 16                             |
| Peng, M et al <sup>12</sup>                | Single   | China                | Shenzhen    | Unclear       | 20/01/20                 | 06/02/20               | 25/02/20               | 56 (41-65)*        | -                                                | 7                                          | 7                                 | 0                              |
| Rahim, F et al <sup>13</sup>               | Single   | Pakistan             | Peshawar    | Unclear       | 01/04/20                 | 31/08/20               | 31/08/20               | 55.7 (11.6)        | -                                                | 204                                        | 47                                | 157                            |
| Samsami, M et al <sup>14</sup>             | Single   | Iran                 | Tehran      | Retrospective | 23/03/20                 | 23/04/20               | 23/04/20               | 63.56 (50.7-74.5)* | -                                                | 26                                         | 25                                | 1                              |
| Shukla, U et al <sup>15</sup>              | Single   | India                | Maharashtra | Retrospective | 01/04/20                 | 14/05/20               | 14/05/20               | 54 (50-64)*        | -                                                | 24                                         | 20                                | 4                              |
| Temel, S et al <sup>16</sup>               | Single   | Turkey               | Kayseri     | Retrospective | 20/03/20                 | 22/04/20               | 22/04/20               | 68.4 (13.4)        | 5 (1-12)**                                       | 47                                         | 22                                | 16                             |
| Wang Y, et al <sup>17</sup>                | Single   | China                | Hubei       | Unclear       | 25/01/20                 | 25/02/20               | 28 days                | 64 (52-72)*        | -                                                | 344                                        | 185                               | 133                            |
| Young, B et al <sup>18</sup>               | Multiple | Singapore            | National    | Unclear       | 23/01/20                 | 03/02/20               | 25/02/20               | -                  | -                                                | 2                                          | 2                                 | 0                              |

|                                         |          |                              |                                     |               |          |          |          |                            |                         |       |      |      |
|-----------------------------------------|----------|------------------------------|-------------------------------------|---------------|----------|----------|----------|----------------------------|-------------------------|-------|------|------|
| Yu, Y et al <sup>19</sup>               | Multiple | China                        | Hubei                               | Prospective   | 26/02/20 | 27/02/20 | 09/04/20 | 64 (57-70)*                | 4 (2-8)*                | 226   | 13   | 9    |
| Zhang G, et al <sup>20</sup>            | Single   | China                        | Hubei                               | Retrospective | 02/01/20 | 10/02/20 | 15/02/20 | -                          | 5 (4-8)*                | 44    | 23   | 9    |
| Zheng, Y et al <sup>21</sup>            | Single   | China                        | Hangzhou                            | Retrospective | 22/01/20 | 05/03/20 | 05/03/20 | 66 (58-76)*                | -                       | 34    | 20   | 0    |
| <b>EUROPE</b>                           |          |                              |                                     |               |          |          |          |                            |                         |       |      |      |
| Aleva, FE et al <sup>22</sup>           | Single   | Netherlands                  | s-Hertogenbosch                     | Unclear       | 09/03/20 | 07/04/20 | 20/06/20 | 65 (10)                    | -                       | 50    | 37   | 13   |
| Barrasa, H et al <sup>23</sup>          | Single   | Spain                        | Vitoria                             | Prospective   | 04/03/20 | 31/03/20 | 06/04/20 | 63 (51-75)*                | 7 (3)                   | 48    | 13   | 14   |
| Borobia, AM et al <sup>24</sup>         | Single   | Spain                        | Madrid                              | Unclear       | 25/02/20 | 19/04/20 | 19/04/20 | 64 (54-71)*                | -                       | 237   | 66   | 55   |
| Cardoso,FS et al <sup>25</sup>          | Single   | Portugal                     | Lisbon                              | Unclear       | 10/03/20 | Unclear  | 10/04/20 | 67 (52-74)*                | 8 (7-9)*                | 20    | 14   | 3    |
| COVID-ICU Group <sup>26</sup>           | Multiple | France, Switzerland, Belgium | -                                   | Prospective   | 25/02/20 | 04/05/20 | 90-day   | 63 (54-71)*                | 5 (3-8)*                | 4224  | 3036 | 1188 |
| de la Rica, R et al <sup>27</sup>       | Single   | Spain                        | Palma de Mallorca                   | Retrospective | 15/03/20 | 31/03/20 | 28/04/20 | 65.57 (12.87)              | -                       | 21    | 8    | 8    |
| Farrell, RJ et al <sup>28</sup>         | Single   | Ireland                      | Dublin                              | Unclear       | 13/03/20 | 01/05/20 | 01/05/20 | 56.7 (11.8)                | -                       | 31    | 18   | 7    |
| Ferrando, C et al <sup>29</sup>         | Multiple | Andorra and Spain            | -                                   | Prospective   | 12/03/20 | 26/05/20 | 26/05/20 | 64 (56-72)*                | 5 (3-7)*                | 960   | 460  | 203  |
| Fraisse, M et al <sup>30</sup>          | Single   | France                       | Argenteuil                          | Retrospective | 06/03/20 | 22/04/20 | 06/05/20 | 61 (55-70)*                | 4 (3-7)*                | 92    | 28   | 38   |
| Giesen, C et al <sup>31</sup>           | Single   | Spain                        | Madrid                              | Retrospective | 27/02/20 | 29/06/20 | 29/06/20 | -                          | -                       | 83    | 45   | 34   |
| Grasselli, G et al <sup>32</sup>        | Multiple | Italy                        | Lombardy                            | Retrospective | 20/02/20 | 22/04/20 | 30/05/20 | 63 (56-69)*                | -                       | 3909  | 2049 | 1769 |
| Gundem, T et al <sup>33</sup>           | Single   | Norway                       | Ullevål                             | Unclear       | 05/03/20 | 28/05/20 | 28/05/20 | Mean (range)<br>59 (25-78) | Mean (range)<br>3 (0-7) | 22    | 20   | 2    |
| Haase, N et al <sup>34</sup>            | Multiple | Denmark                      | National                            | Retrospective | 10/03/20 | 19/05/20 | 16/06/20 | 68 (59-75)*                | -                       | 323   | 211  | 108  |
| Halvatsiotis, P et al <sup>35</sup>     | Multiple | Greece                       | National                            | Retrospective | 10/03/20 | 13/04/20 | 13/04/20 | 65.5 (56-73)*              | -                       | 90    | 12   | 26   |
| ICNARC <sup>36</sup>                    | Multiple | UK                           | England, Wales and Northern Ireland | Retrospective | 01/03/20 | 31/08/20 | 17/12/20 | 58.8 (12.7)                | -                       | 10935 | 6622 | 4311 |
|                                         |          |                              |                                     |               | 01/09/20 | 17/12/20 | 17/12/20 | 60.8 (13.7)                | -                       | 7677  | 3832 | 2347 |
| Ilias, I et al <sup>37</sup>            | Single   | Greece                       | Athens                              | Unclear       | 20/03/20 | 03/05/20 | 29/05/20 | 64.7 (9.7)                 | 8 (2)                   | 36    | 18   | 11   |
| Kaeuffer, C et al <sup>38</sup>         | Multiple | France                       | Alsace                              | Prospective   | 20/03/20 | 20/03/20 | 7-days   | 67.3 (13.4)                | -                       | 335   | 24   | 26   |
| Klein, SJ et al <sup>39</sup>           | Multiple | Austria                      | Tyrol                               | Unclear       | 09/03/20 | 04/06/20 | 17/07/20 | 64 (54-74.5)*              | -                       | 106   | 82   | 23   |
| Klok, FA et al <sup>40</sup>            | Multiple | Netherlands                  | National                            | Unclear       | 07/03/20 | 05/04/20 | 22/04/20 | 64 (12)                    | -                       | 184   | 78   | 41   |
| Kokoszka-Bargiel, I et al <sup>41</sup> | Single   | Poland                       | Silesian District                   | Retrospective | 10/03/20 | 10/06/20 | 10/06/20 | 62.4 (10.4)                | -                       | 32    | 9    | 18   |
| Kristinsson, B et al <sup>42</sup>      | Multiple | Iceland                      | National                            | Prospective   | 14/03/20 | 13/04/20 | 06/05/20 | 64 (37-80)**               | -                       | 27    | 23   | 4    |

|                                         |          |             |                  |               |          |          |          |                 |            |     |     |    |
|-----------------------------------------|----------|-------------|------------------|---------------|----------|----------|----------|-----------------|------------|-----|-----|----|
| Larsson, E et al <sup>43</sup>          | Single   | Sweden      | Stockholm        | Unclear       | 09/03/20 | 20/04/20 | 30/04/20 | 59 (51-65)*     | -          | 260 | 138 | 60 |
| Liabeuf, S et al <sup>44</sup>          | Single   | France      | Amiens           | Retrospective | 28/02/20 | 30/03/20 | 14/04/20 | 66 (57-74)*     | -          | 69  | 30  | 16 |
| Litijos, JF et al <sup>45</sup>         | Multiple | France      | -                | Retrospective | 19/03/20 | 11/04/20 | Unclear  | 68 (51.5-74.5)* | 3 (2-4.7)* | 26  | 16  | 3  |
| Madsen, LW et al <sup>46</sup>          | Single   | Denmark     | Odense           | Prospective   | 10/03/20 | 21/04/20 | 01/05/20 | 63 (60-69)*     | -          | 13  | 13  | 0  |
| Micallef, S et al <sup>47</sup>         | Single   | Malta       | National         | Retrospective | 07/03/20 | 24/04/20 | 30-days  | -               | -          | 7   | 7   | 0  |
| Montastruc, F et al <sup>48</sup>       | Single   | France      | Toulouse         | Unclear       | 10/03/20 | 21/04/20 | 21/04/20 | 63.4 (20-89)**  | -          | 96  | 70  | 9  |
| Pedersen, HP et al <sup>49</sup>        | Single   | Denmark     | Zealand          | Retrospective | 11/03/20 | 01/04/20 | 16/04/20 | 69.5 (56-84)**  | -          | 17  | 4   | 7  |
| Piva, S et al <sup>50</sup>             | Single   | Italy       | Lombardy         | Prospective   | 02/03/20 | 13/03/20 | Unclear  | 64 (59-72)*     | 3.5 (3-7)* | 33  | 9   | 1  |
| Primmaz, S et al <sup>51</sup>          | Single   | Switzerland | Geneva           | Prospective   | 09/03/20 | 19/05/20 | Unclear  | 64 (57-73)*     | 6 (4-7)*   | 129 | 105 | 24 |
| Rieg, S et al <sup>52</sup>             | Single   | Germany     | Freiburg         | Retrospective | 25/02/20 | 08/05/20 | 19/06/20 | 65 (59-76)*     | -          | 70  | 38  | 32 |
| Rodriguez, A et al <sup>53</sup>        | Multiple | Spain       | Tarragona        | Prospective   | 14/03/20 | 15/04/20 | 28 days  | 65.5 (52-72)*   | 6 (4-7)*   | 43  | 28  | 10 |
| Roedel, K et al <sup>54</sup>           | Multiple | Germany     | Hamburg          | Retrospective | 01/02/20 | 03/06/20 | 03/06/20 | 69 (58-77.5)*   | 5 (3-9)*   | 223 | 145 | 78 |
| Routsis, C et al <sup>55</sup>          | Single   | Greece      | Athens           | Prospective   | 11/03/20 | 27/04/20 | 16/06/20 | 64 (58-72)*     | 7 (3-9)*   | 50  | 33  | 16 |
| Rubin, S et al <sup>56</sup>            | Multiple | France      | Bordeaux         | Unclear       | 03/03/20 | 14/04/20 | Unclear  | 61.2 (12.2)     | 6.4 (3.9)  | 71  | 38  | 4  |
| Serrano-Martinez, J et al <sup>57</sup> | Single   | Spain       | Grenada          | Retrospective | 12/03/20 | 01/05/20 | 01/05/20 | 63 (54-70)*     | 8 (4-9)*   | 59  | 36  | 20 |
| Simonnet, A et al <sup>58</sup>         | Single   | France      | Lille            | Retrospective | 27/02/20 | 05/04/20 | 06/04/20 | 60 (51-70)*     | -          | 124 | 60  | 18 |
| Taboada, M et al <sup>59</sup>          | Multiple | Spain       | Galicia          | Prospective   | 21/03/20 | 19/04/20 | 06/05/20 | 69 (61-73)*     | -          | 97  | 73  | 15 |
| van Halem, K et al <sup>60</sup>        | Single   | Belgium     | Hasselt          | Retrospective | 11/03/20 | 15/04/20 | 15/04/20 | -               | -          | 63  | 40  | 23 |
| Wendel Garcia, PD et al <sup>61</sup>   | Multiple | Continental | -                | Prospective   | Unclear  | 22/04/20 | 22/04/20 | 63 (53-71)*     | 9 (6-13)*  | 639 | 301 | 97 |
| Wilbers, TJ et al <sup>62</sup>         | Single   | Netherlands | Arnhem           | Retrospective | 16/03/20 | 10/05/20 | 13/05/20 | -               | -          | 37  | 19  | 12 |
| <b>NORTH AMERICA</b>                    |          |             |                  |               |          |          |          |                 |            |     |     |    |
| Ali, K et al <sup>63</sup>              | Single   | USA         | Texas            | Unclear       | 01/03/20 | 15/05/20 | 15/05/20 | 64              | -          | 35  | 18  | 17 |
| Arentz, M et al <sup>64</sup>           | Single   | USA         | Washington State | Unclear       | 20/02/20 | 05/03/20 | 17/03/20 | 70 (43-92)**    | -          | 21  | 2   | 11 |
| Arizpe-Bravo, D et al <sup>65</sup>     | Single   | Mexico      | Puebla City      | Retrospective | 15/03/20 | 15/07/20 | 15/07/20 | 54*             | -          | 28  | 26  | 1  |
| Auld, SC et al <sup>66</sup>            | Multiple | USA         | Georgia          | Retrospective | 06/03/20 | 17/04/20 | 07/05/20 | 64 (54-73)*     | 7 (5-11)*  | 217 | 147 | 62 |
| Bhatraju, PK et al <sup>67</sup>        | Multiple | USA         | Seattle          | Unclear       | 24/02/20 | 09/03/20 | 23/03/20 | 64 (18)         | -          | 24  | 9   | 12 |

|                                     |          |           |               |               |          |          |          |                          |                    |     |     |    |
|-------------------------------------|----------|-----------|---------------|---------------|----------|----------|----------|--------------------------|--------------------|-----|-----|----|
| Cavayas, YA et al <sup>68</sup>     | Single   | Canada    | Montreal      | Retrospective | 20/03/20 | 13/05/20 | 27/07/20 | 62 (53-72)*              | 5 (3-7)*           | 75  | 58  | 17 |
| Fadel, FA et al <sup>69</sup>       | Single   | USA       | Ohio          | Retrospective | 15/03/20 | 01/06/20 | 29/06/20 | 67.3 (13.7)              | -                  | 495 | 404 | 91 |
| Farooqi, FI et al <sup>70</sup>     | Single   | USA       | Florida       | Unclear       | Unclear  | Unclear  | Unclear  | 61.7 (11.4)              | 10 (0.8)           | 3   | 3   | 0  |
| Filardo, TD et al <sup>71</sup>     | Single   | USA       | New York      | Retrospective | 09/03/20 | 08/04/20 | 30-days  | 60 (51-68)*              | -                  | 135 | 41  | 72 |
| Fraser, DD et al <sup>72</sup>      | Single   | Canada    | Ontario       | Unclear       | Unclear  | Unclear  | Unclear  | 61 (54.8-67)*            | 4.5 (2.8-9.3)*     | 10  | 6   | 4  |
| Maatman, TK et al <sup>73</sup>     | Multiple | USA       | Indianapolis  | Retrospective | 12/03/20 | 31/03/20 | 06/05/20 | 61 (16)                  | -                  | 109 | 79  | 27 |
| McCarthy, CP et al <sup>74</sup>    | Multiple | USA       | Massachusetts | Retrospective | 07/03/20 | 30/03/20 | 24/06/20 | -                        | -                  | 103 | 79  | 23 |
| Mitra, AR et al <sup>75</sup>       | Multiple | Canada    | Vancouver     | Retrospective | 21/02/20 | 14/04/20 | 05/05/20 | 69 (60-75)*              | 6 (2-11)*          | 117 | 87  | 18 |
| Mittel, AM et al <sup>76</sup>      | Single   | USA       | New York      | Retrospective | 24/03/20 | 14/05/20 | 14/05/20 | Median (SD)<br>63 (12.6) | -                  | 133 | 44  | 55 |
| Mukherjee, V et al <sup>77</sup>    | Single   | USA       | New York      | Retrospective | 10/03/20 | 07/04/20 | 18/05/20 | 59 (51-70)*              | -                  | 137 | 53  | 82 |
| Ramani, C et al <sup>78</sup>       | Single   | USA       | Virginia      | Unclear       | Unclear  | Unclear  | 30/07/20 | 55.5 (11.9)              | 6 (2.5)            | 102 | 59  | 22 |
| Sosa-Garcia, JO et al <sup>79</sup> | Single   | Mexico    | Mexico City   | Retrospective | 20/03/20 | 05/06/20 | 05/06/20 | 58 (46-67)*              | MEXSOFA<br>7 (5-8) | 56  | 42  | 10 |
| Suleyman, G et al <sup>80</sup>     | Multiple | USA       | Michigan      | Retrospective | 09/03/20 | 27/03/20 | 30-day   | 63.8 (15.4)              | -                  | 141 | 65  | 57 |
| Yang, SS et al <sup>81</sup>        | Single   | Canada    | Quebec        | Retrospective | 05/03/20 | 21/05/20 | 04/08/20 | 66 (54-74)*              | 5 (3-8)*           | 106 | 88  | 18 |
| <b>OCEANIA</b>                      |          |           |               |               |          |          |          |                          |                    |     |     |    |
| Nadkarni, A et al <sup>82</sup>     | Single   | Australia | Adelaide      | Unclear       | 24/03/20 | 13/04/20 | 23/04/20 | 67 (60-73)*              | -                  | 18  | 13  | 4  |
| <b>SOUTH AMERICA</b>                |          |           |               |               |          |          |          |                          |                    |     |     |    |
| Bisso, IC et al <sup>83</sup>       | Single   | Argentina | Buenos Aires  | Unclear       | 15/03/20 | 15/04/20 | 15/04/20 | 71 (52-75)*              | 2 (2-3.5)*         | 7   | 4   | 0  |

## Supplementary Material S15. COVID-19 Critical Care Mortality Meta-Analysis Reference List

1. Saida I Ben, Ennouri E, Nachi R, Meddeb K, Mahmoud J, Thabet N, et al. Very severe COVID-19 in the critically ill in Tunisia. *Pan Afr Med J.* 2020;
2. Alshukry A, Ali H, Ali Y, Al-Taweel T, Abu-Farha M, AbuBaker J, et al. Clinical characteristics of coronavirus disease 2019 (COVID-19) patients in Kuwait. *PLoS One.* 2020;15(11):e0242768.
3. Amit M, Sorkin A, Chen J, Cohen B, Karol D, Tsur AM, et al. Clinical Course and Outcomes of Severe Covid-19: A National Scale Study. *J Clin Med.* 2020 Jul 18;9(7):2282.
4. Chew SY, Lee YS, Ghimiray D, Tan CK, Chua GS. Characteristics and Outcomes of COVID-19 Patients with Respiratory Failure Admitted to a “Pandemic Ready” Intensive Care Unit – Lessons from Singapore. *Ann Acad Med Singapore.* 2020 Jul 31;49(7):434–48.
5. Hu H-T, Xu S, Wang J, Rao X, H.-T. H, S. X, et al. Respiratory Support in Severely or Critically Ill ICU Patients With COVID-19 in Wuhan, China. *Curr Med Sci.* 2020;40(4):636–41.
6. KocayİĞİt H, Özmen SÜner K, Tomak Y, Demİr Gü, KocayİĞİt İ, Yaylaci S, et al. Characteristics and Outcomes of Critically Ill Patients with Covid-19 in Sakarya, Turkey: A Single Center Cohort Study. *Turkish J Med Sci.* 2020 Nov;
7. Ling L, So C, Shum HP, Chan PKS, Lai CKC, Kandamby DH, et al. Critically ill patients with COVID-19 in Hong Kong: a multicentre retrospective observational cohort study. *Crit Care Resusc.* 2020;22(2):119–25.
8. Mori S, Ai T, Otomo Y. Characteristics, laboratories, and prognosis of severe COVID-19 in the Tokyo metropolitan area: A retrospective case series. *PLoS One.* 2020;
9. Nadeem A, Hamed F, Saleh K, Abduljawad B, Mallat J. ICU outcomes of COVID-19 critically ill patients: An international comparative study. *Anaesthesia, Crit care pain Med.* 2020;39(4):487–9.
10. Omrani AS, Almaslamani MA, Daghfal J, Alattar RA, Elgara M, Shaar SH, et al. The first consecutive 5000 patients with Coronavirus Disease 2019 from Qatar; a nation-wide cohort study. *BMC Infect Dis.* 2020;
11. Pande Di, Kochhar A, Saini S, Ganapathy U, Gogia A. An update on initial epidemiological profile, clinical course, and outcome of COVID-19 patients at a tertiary care center in India. *Indian J Palliat Care.* 2020;
12. Peng M, Liu X, Li J, Ren D, Liu Y, Meng X, et al. Successful management of seven cases of critical COVID-19 with early noninvasive-invasive sequential ventilation algorithm and bundle pharmacotherapy. *Front Med.* 2020 Oct 6;14(5):674–80.
13. Rahim F, Amin S, Noor M, Bahadur S, Gul H, Mahmood A, et al. Mortality of Patients With Severe COVID-19 in the Intensive Care Unit: An Observational Study From a Major COVID-19 Receiving Hospital. *Cureus.* 2020 Oct 12;12(10):e10906–e10906.
14. Samsami M, Mehravaran E, Tabarsi P, Javadi A, Arsang-Jang S, Komaki A, et al. Clinical and demographic characteristics of patients with COVID-19 infection: Statistics from a single hospital in Iran. *Hum Antibodies.* 2020 Sep;
15. Shukla U, Chavali S, Mukta P, Mapari A, Vyas A. Initial Experience of Critically Ill Patients with COVID-19 in Western India: A Case Series. *Indian J Crit Care Med.* 2020 Jul;24(7):509–13.
16. Temel Ş, Gündoğan K, Ülger B, Arican H, Bulut K, Sari A, et al. Characteristics and Outcomes of the Patients Infected with SARS-CoV-2 Admitted to Intensive Care Units: Erciyes University COVID-19 Center Experience. *ERCİYES Med J.* 2020;42(4):436–40.
17. Wang Y, Lu X, Li Y, Chen H, Chen T, Su N, et al. Clinical Course and Outcomes of 344 Intensive Care Patients with COVID-19. *Am J Respir Crit Care Med.* 2020 Jun;201(11):1430–4.
18. Young BE, Ong SWX, Kalimuddin S, Low JG, Tan SY, Loh J, et al. Epidemiologic Features and Clinical Course of Patients Infected with SARS-CoV-2 in Singapore. *JAMA - J Am Med Assoc.* 2020;323(15):1488–94.
19. Yu Y, Xu D, Fu S, Zhang J, Yang X, Xu L, et al. Patients with COVID-19 in 19 ICUs in Wuhan, China: a cross-sectional study. *Crit Care.* 2020 Dec 14;24(1):219.
20. Zhang G, Hu C, Luo L, Fang F, Chen Y, Li J, et al. Clinical features and short-term outcomes of 221 patients with COVID-19 in

Wuhan, China. *J Clin Virol.* 2020 Jun;127:104364.

21. Zheng Y, Sun L-J, Xu M, Pan J, Zhang Y-T, Fang X, et al. Clinical characteristics of 34 COVID-19 patients admitted to intensive care unit in Hangzhou, China. *J Zhejiang Univ.* 2020 May 20;21(5):378–87.
22. Aleva FE, van Mourik L, Broeders MEAC, Paling AJ, de Jager CPC. COVID-19 in critically ill patients in North Brabant, the Netherlands: Patient characteristics and outcomes. *J Crit Care.* 2020 Dec;60:111–5.
23. Barrasa H, Rello J, Tejada S, Martín A, Balziskueta G, Vinuesa C, et al. SARS-CoV-2 in Spanish Intensive Care Units: Early experience with 15-day survival in Vitoria. *Anaesth Crit Care Pain Med.* 2020 Oct;39(5):553–61.
24. Borobia A, Carcas A, Arnalich F, Álvarez-Sala R, Monserrat-Villatoro J, Quintana M, et al. A Cohort of Patients with COVID-19 in a Major Teaching Hospital in Europe. *J Clin Med.* 2020 Jun 4;9(6):1733.
25. Cardoso FS, Pereira R, Germano N. Liver injury in critically ill patients with COVID-19: a case series. *Crit Care.* 2020 Dec 5;24(1):190.
26. Schmidt M, Hajage D, Demoule A, Pham T, Combes A, Dres M, et al. Clinical characteristics and day-90 outcomes of 4244 critically ill adults with COVID-19: a prospective cohort study. *Intensive Care Med.* 2020;
27. de la Rica R, Borges M, Aranda M, del Castillo A, Socias A, Payeras A, et al. Low Albumin Levels Are Associated with Poorer Outcomes in a Case Series of COVID-19 Patients in Spain: A Retrospective Cohort Study. *Microorganisms.* 2020 Jul 24;8(8):1106.
28. Farrell RJ, O'Regan R, O'Neill E, Bowens G, Maclellan A, Gileece A, et al. Sociodemographic variables as predictors of adverse outcome in SARS-CoV-2 infection: an Irish hospital experience. *Ir J Med Sci.* 2020;
29. Ferrando C, Mellado-Artigas R, Gea A, Arruti E, Aldecoa C, Bordell A, et al. Características, evolución clínica y factores asociados a la mortalidad en UCI de los pacientes críticos infectados por SARS-CoV-2 en España: estudio prospectivo, de cohorte y multicéntrico. *Rev Esp Anesthesiol Reanim.* 2020 Oct;67(8):425–37.
30. Fraissé M, Logre E, Pajot O, Mentec H, Plantefève G, Contou D. Thrombotic and hemorrhagic events in critically ill COVID-19 patients: A French monocenter retrospective study. *Crit Care.* 2020;24:1–4.
31. Giesen C, Diez-Izquierdo L, Saa-Requejo CM, Lopez-Carrillo I, Lopez-Vilela CA, Seco-Martinez A, et al. Epidemiological characteristics of the COVID-19 outbreak in a secondary hospital in Spain. *Am J Infect Control.* 2020 Jul;
32. Grasselli G, Greco M, Zanella A, Albano G, Antonelli M, Bellani G et al; COVID-19 Lombardy ICU Network. Risk factors associated with mortality among patients with COVID-19 in intensive care units in Lombardy, Italy. *JAMA Intern Med.* 2020 Oct 1;180(10):1345-1355.
33. Gundem T, Olasveengen TM, Hovda KE, Gaustad K, Schondorf C, Rostrup M, et al. Ventilatory support for hypoxaemic intensive care patients with COVID-19. *Vent hypoksemiske intensivpasienter med covid-19.* 2020;140(11).
34. Haase N, Plovsing R, Christensen S, Poulsen LM, Brøchner AC, Rasmussen BS, et al. Characteristics, interventions, and longer term outcomes of COVID-19 ICU patients in Denmark—A nationwide, observational study. *Acta Anaesthesiol Scand.* 2021 Jan 3;65(1):68–75.
35. Halvatsiotis P, Kotanidou A, Tzannis K, Jahaj E, Magira E, Theodorakopoulou M, et al. Demographic and clinical features of critically ill patients with COVID-19 in Greece: The burden of diabetes and obesity. *Diabetes Res Clin Pract.* 2020;166:108331.
36. Intensive Care National Audit and Research Centre. ICNARC report on COVID-19 in critical care- 18 December 2020. 2020. Available from: <https://www.icnarc.org/Our-Audit/Audits/Cmp/Reports>
37. Ilias I, Jahaj E, Kokkoris S, Zervakis D, Temperikidis P, Magira E, et al. Clinical Study of Hyperglycemia and SARS-CoV-2 Infection in Intensive Care Unit Patients. *In Vivo (Brooklyn).* 2020 Aug 31;34(5):3029–32.
38. Kaeuffer C, Hyaric C Le, Fabacher T, Mootien J, Dervieux B, Ruch Y, et al. Clinical characteristics and risk factors associated with severe COVID-19: prospective analysis of 1,045 hospitalised cases in North-Eastern France, March 2020. *Eurosurveillance.* 2020;
39. Klein SJ, Bellmann R, Dejaco H, Eschertzhuber S, Fries D, Furtwängler W, et al. Structured ICU resource management in

- a pandemic is associated with favorable outcome in critically ill COVID-19 patients. *Wien Klin Wochenschr.* 2020 Nov;132(21–22):653–63.
40. Klok FA, Kruip MJHA, van der Meer NJM, Arbous MS, Gommers D, Kant KM, et al. Confirmation of the high cumulative incidence of thrombotic complications in critically ill ICU patients with COVID-19: An updated analysis. *Thromb Res.* 2020 Jul;191:148–50.
  41. Kokoszka-Bargiel I, Cyprys P, Rutkowska K, Madowicz J, Knapik P. Intensive Care Unit Admissions During the First 3 Months of the COVID-19 Pandemic in Poland: A Single-Center, Cross-Sectional Study. *Med Sci Monit Int Med J Exp Clin Res.* 2020 Sep;26:e926974.
  42. Kristinsson B, Kristinsdottir LB, Blondal AT, Thormar KM, Kristjansson M, Karason S, et al. Nationwide Incidence and Outcomes of Patients With Coronavirus Disease 2019 Requiring Intensive Care in Iceland. *Crit Care Med.* 2020 Nov;48(11):e1102–5.
  43. Larsson E, Brattström O, Agvald-Öhman C, Grip J, Campoccia Jalde F, Strålin K, et al. Characteristics and outcomes of patients with COVID-19 admitted to ICU in a tertiary hospital in Stockholm, Sweden. *Acta Anaesthesiol Scand.* 2021 Jan 15;65(1):76–81.
  44. Liabeuf S, Moragny J, Bennis Y, Batteux B, Brochot E, Schmit JL, et al. Association between renin–angiotensin system inhibitors and COVID-19 complications. *Eur Hear J - Cardiovasc Pharmacother.* 2020 Jun 12;
  45. Llitjos J-F, Leclerc M, Chochois C, Monsallier J-M, Ramakers M, Auvray M, et al. High incidence of venous thromboembolic events in anticoagulated severe COVID-19 patients. *J Thromb Haemost.* 2020;18(7):1743–6.
  46. Madsen LW, Lindvig SO, Rasmussen LD, Knudtzen FC, Laursen CB, Øvrehus A, et al. Low mortality of hospitalised patients with COVID-19 in a tertiary Danish hospital setting. *Int J Infect Dis.* 2020 Jan;102:212–9.
  47. Micallef S, Piscopo T V., Casha R, Borg D, Vella C, Zammit MA, et al. The first wave of COVID-19 in Malta; a national cross-sectional study. *PLoS One.* 2020;
  48. Montastruc F, Romano C, Montastruc J-L, Silva S, Seguin T, Minville V, et al. Pharmacological characteristics of patients infected with SARS-Cov-2 admitted to Intensive Care Unit in South of France. *Therapie.* 2020;75(4):381–4.
  49. Pedersen HP, Hildebrandt T, Poulsen A, Uslu B, Knudsen HH, Roed J, et al. Initial experiences from patients with COVID-19 on ventilatory support in Denmark. *Dan Med J.* 2020;67(5).
  50. Piva S, Filippini M, Turla F, Cattaneo S, Margola A, De Fulviis S, et al. Clinical presentation and initial management critically ill patients with severe acute respiratory syndrome coronavirus 2 (SARS-CoV-2) infection in Brescia, Italy. *J Crit Care.* 2020 Aug;58:29–33.
  51. Primmaz S, Le Terrier C, Suh N, Ventura F, Boroli F, Bendjelid K, et al. Preparedness and Reorganization of Care for Coronavirus Disease 2019 Patients in a Swiss ICU: Characteristics and Outcomes of 129 Patients. *Crit Care Explor.* 2020 Aug;2(8):e0173.
  52. Rieg S, von Cube M, Kalbhenn J, Utzolino S, Pernice K, Bechet L, et al. COVID-19 in-hospital mortality and mode of death in a dynamic and non-restricted tertiary care model in Germany. *PLoS One.* 2020;
  53. Rodríguez A, Moreno G, Gómez J, Carbonell R, Picó-Plana E, Benavent Bofill C, et al. Infección grave por coronavirus SARS-CoV-2: experiencia en un hospital de tercer nivel con pacientes afectados por COVID-19 durante la pandemia 2020. *Med Intensiva.* 2020 Dec;44(9):525–33.
  54. Roedl K, Jarczak D, Thasler L, Bachmann M, Schulte F, Bein B, et al. Mechanical ventilation and mortality among 223 critically ill patients with coronavirus disease 2019: A multicentric study in Germany. *Aust Crit Care.* 2020;
  55. Routsis C, Magira E, Kokkoris S, Siembos I, Vrettou C, Zervakis D, et al. Hospital Resources May Be an Important Aspect of Mortality Rate among Critically Ill Patients with COVID-19: The Paradigm of Greece. *J Clin Med.* 2020;
  56. Rubin S, Orieux A, Prevel R, Garric A, Bats M-L, Dabernat S, et al. Characterization of acute kidney injury in critically ill patients with severe coronavirus disease 2019. *Clin Kidney J.* 2020 Jun;13(3):354–61.
  57. Serrano-Martinez JL, Machado-Casas JF, Redondo-Orts M, Manzano-Manzano F, Castano-Perez J, Perez-Villares JM, et al. Characteristics and results of a series of 59 patients with severe pneumonia due to COVID-19 admitted in the ICU. *Med Intensiva.*

2020;

58. Simonnet A, Chetboun M, Poissy J, Raverdy V, Noulette J, Duhamel A, et al. High Prevalence of Obesity in Severe Acute Respiratory Syndrome Coronavirus-2 (SARS-CoV-2) Requiring Invasive Mechanical Ventilation. *Obesity*. 2020;28(7):1195–9.
59. Taboada M, Rama P, Pita-Romero R, Moreno E, Leal S, Varela M, et al. Critically ill COVID-19 patients attended by anesthesiologists in northwestern Spain: a multicenter prospective observational study. *Rev Esp Anestesiol Reanim*. 2020;
60. van Halem K, Bruyndonckx R, van der Hilst J, Cox J, Driesen P, Opsomer M, et al. Risk factors for mortality in hospitalized patients with COVID-19 at the start of the pandemic in Belgium: a retrospective cohort study. *BMC Infect Dis*. 2020;20(1):897.
61. Wendel Garcia PD, Fumeaux T, Guerci P, Heuberger DM, Montomoli J, Roche-Campo F, et al. Prognostic factors associated with mortality risk and disease progression in 639 critically ill patients with COVID-19 in Europe: Initial report of the international RISC-19-ICU prospective observational cohort. *EClinicalMedicine*. 2020 Aug;25:100449.
62. Wilbers TJ, Koning M V. Renal replacement therapy in critically ill patients with COVID-19: A retrospective study investigating mortality, renal recovery and filter lifetime. *J Crit Care*. 2020 Dec;60:103–5.
63. Ali K, Rao S, Dennis J, Berdine G, Test V, Nugent K. Basic Demographic Parameters Help Predict Outcomes in Patients Hospitalized With COVID-19 During the First Wave of Infection in West Texas. *J Prim Care Community Health*. 2020 Jan 1;11:2150132720970717.
64. Arentz M, Yim E, Klaff L, Lokhandwala S, Riedo FX, Chong M, et al. Characteristics and Outcomes of 21 Critically Ill Patients With COVID-19 in Washington State. *JAMA*. 2020 Apr 28;323(16):1612.
65. Arizpe-Bravo D, Arizpe-Bravo A, Leon RB, Chacon-Cano R, Arizpe-Vilana D, Anthon F, et al. Experience with COVID-19 critically ill patients in a private community hospital in Puebla City, Mexico. *Chest*. 2020/10/12. 2020 Oct;158(4):A2482–3.
66. Auld SC, Caridi-Scheible M, Blum JM, Robichaux C, Kraft C, Jacob JT, et al. ICU and Ventilator Mortality Among Critically Ill Adults With Coronavirus Disease 2019. *Crit Care Med*. 2020 May 26;Publish Ah(9):e799–804.
67. Bhatraju PK, Ghassemieh BJ, Nichols M, Kim R, Jerome KR, Nalla AK, et al. Covid-19 in Critically Ill Patients in the Seattle Region - Case Series. *N Engl J Med*. 2020;382(21):2012–22.
68. Cavayas YA, Noël A, Brunette V, Williamson D, Frenette AJ, Arsenault C, et al. Early experience with critically ill patients with COVID-19 in Montreal. *Can J Anesth Can d’anesthésie*. 2020 Sep 15;
69. Fadel FA, Al-Jaghbeer M, Kumar S, Griffiths L, Wang X, Han X, et al. Clinical characteristics and outcomes of critically ill patients with COVID-19 in Northeast Ohio: low mortality and length of stay. *Acute Crit care*. 2020 Oct;
70. Farooqi FI, Morgan RC, Dhawan N, Dinh J, Yatzkan G, Michel G. Airway Hygiene in COVID-19 Pneumonia: Treatment Responses of 3 Critically Ill Cruise Ship Employees. *Am J Case Rep*. 2020 Aug 10;21:e926596.
71. Filardo TD, Khan MR, Krawczyk N, Galitzer H, Karmen-Tuohy S, Coffee M, et al. Comorbidity and clinical factors associated with COVID-19 critical illness and mortality at a large public hospital in New York City in the early phase of the pandemic (March-April 2020). *PLoS One*. 2020;15(11):e0242760.
72. Fraser DD, Slessarev M, Martin CM, Daley M, Patel MA, Miller MR, et al. Metabolomics Profiling of Critically Ill Coronavirus Disease 2019 Patients: Identification of Diagnostic and Prognostic Biomarkers. *Crit care Explor*. 2020 Oct;2(10):e0272.
73. Maatman TK, Jalali F, Feizpour C, Douglas A, McGuire SP, Kinnaman G, et al. Routine Venous Thromboembolism Prophylaxis May Be Inadequate in the Hypercoagulable State of Severe Coronavirus Disease 2019. *Crit Care Med*. 2020 May 27;Publish Ah(9):e783–90.
74. McCarthy CP, Murphy S, Jones-O’Connor M, Olshan DS, Khambhati JR, Rehman S, et al. Early clinical and sociodemographic experience with patients hospitalized with COVID-19 at a large American healthcare system. *EClinicalMedicine*. 2020 Sep;26:100504.
75. Mitra AR, Fergusson NA, Lloyd-Smith E, Wormsbecker A, Foster D, Karpov A, et al. Baseline characteristics and outcomes of patients with COVID-19 admitted to intensive care units in Vancouver, Canada: a case series. *CMAJ*. 2020 Jun;192(26):E694–701.



76. Mittel AM, Panzer O, Wang DS, Miller SE, Schaff JE, Hastie MJ, et al. Logistical Considerations and Clinical Outcomes Associated with Converting Operating Rooms into an Intensive Care Unit during the Covid-19 Pandemic in a New York City Hospital. *Anesth Analg*. 2020 Oct;
77. Mukherjee V, Toth AT, Fenianos M, Martell S, Karpel HC, Postelnicu R, et al. Clinical Outcomes in Critically Ill Coronavirus Disease 2019 Patients: A Unique New York City Public Hospital Experience. *Crit Care Explor*. 2020 Aug;2(8):e0188.
78. Ramani C, Davis EM, Kim JS, Provencio JJ, Enfield KB, Kadl A. Post-ICU COVID-19 Outcomes. *Chest*. 2020 Aug;
79. Sosa-García JO, Gutiérrez-Villaseñor AO, García-Briones A, Romero-González JP, Juárez-Hernández E, González-Chon O. Experience in the management of severe COVID-19 patients in an intensive care unit. *Cir Cir*. 2020;88(5):569–75.
80. Suleyman G, Fadel RA, Malette KM, Hammond C, Abdulla H, Entz A, et al. Clinical Characteristics and Morbidity Associated With Coronavirus Disease 2019 in a Series of Patients in Metropolitan Detroit. *JAMA Netw Open*. 2020 Jun;3(6):e2012270.
81. Yang SS, Lipes J, Dial S, Schwartz B, Laporta D, Wong E, et al. Outcomes and clinical practice in patients with COVID-19 admitted to the intensive care unit in Montréal, Canada: a descriptive analysis. *C open*. 2020;8(4):E788–95.
82. Nadkarni A, Alderson S, Collett L, Maiden M, Reddi B, Sundararajan K. Impact of COVID-19 on an Australian intensive care unit: lessons learned from South Australia. *Intern Med J*. 2020 Sep;50(9):1146–50.
83. Carboni Bisso I, Huespe I, Lockhart C, Massó A, González Anaya J, Hornos M, et al. [COVID-19 in the intensive care unit. Analysis of the experience during the first month of pandemic]. *Medicina (B Aires)*. 2020;80 Suppl 3:25–30.

### Supplementary Material S16. Case fatality rate for Covid-19 infection as of 11 December 2020

| Region        | Total cases (n) | Total deaths (n) | Case fatality rate | 2·5% CI | 97·5% CI | Cases per 100 000 population |
|---------------|-----------------|------------------|--------------------|---------|----------|------------------------------|
| Africa        | 2344616         | 55662            | 2·37%              | 2·35%   | 2·39%    | 57                           |
| Asia          | 18909807        | 309745           | 1·64%              | 1·63%   | 1·64%    | 405                          |
| Europe        | 19588248        | 451198           | 2·30%              | 2·30%   | 2·31%    | 849                          |
| North America | 18359411        | 439095           | 2·39%              | 2·38%   | 2·40%    | 483                          |
| Oceania       | 30905           | 943              | 3·05%              | 2·86%   | 3·24%    | 22                           |
| South America | 11847866        | 338096           | 2·85%              | 2·84%   | 2·86%    | 1766                         |
| World         | 142163148       | 3189508          | 2·24%              | 2·24%   | 2·25%    | 140                          |

CI confidence interval

Data source: Ritchie H, Ortiz-Ospina E, Beltekian D, et al. Mortality Risk of COVID-19. 2020. Available from <https://ourworldindata.org/mortality-risk-covid> (accessed 14 December 2020)

**Interpretation:** Although the case fatality rate for COVID-19 in Africa is similar to North America, the low number of cases reported per 100 000 population, may represent under reporting of asymptomatic, infected patients through inadequate testing. This would lead to a lower case fatality rate, than that which is reported in the table. It is therefore possible that that the overall mortality in Africa following COVID-19 infection may be lower than the global mortality rate.
